# Supplementary material for: Twenty-Five Novel Loci for Carotid Intima-Media Thickness: A Genome-Wide Association Study in >45 000 Individuals and Meta-Analysis of >100 000 Individuals
Source: PubMed Central journal article supplement (PMC8939707; doi:10.1161/atvbaha.121.317007), 2021-12-02
Supplement: atv-42-484-s001.pdf [file atv-42-484-s001.pdf]

## **SUPPLEMENTAL MATERIAL**

### **25 novel loci for carotid intima-media thickness: a genome-wide association study in >45,000 individuals and meta-analysis of >100,000 individuals**

Ming Wai Yeung, MSc<sup>1,2</sup>; Siqi Wang, MSc<sup>1,3</sup>; Yordi J. van de Vegte, BSc<sup>1</sup>; Oleg Borisov, MD, PhD<sup>4</sup>; Jessica van Setten, PhD<sup>2</sup>; Harold Snieder, PhD<sup>3</sup>; Niek Verweij, PhD<sup>1</sup>; M. Abdullah Said, MD, PhD<sup>1</sup>; Pim van der Harst, MD, PhD<sup>1,2</sup>

<sup>1</sup> University of Groningen, University Medical Center Groningen, Department of Cardiology, 9700 RB Groningen, the Netherlands

<sup>2</sup> Department of Cardiology, Division of Heart & Lungs, University Medical Center Utrecht, University of Utrecht, Utrecht, the Netherlands

<sup>3</sup> Department of Epidemiology, University of Groningen, University Medical Center Groningen, 9700 RB, Groningen, The Netherlands.

<sup>4</sup> Institute for Genomic Statistics and Bioinformatics, University Hospital Bonn, Bonn, Germany

#### **Contents:**

**Supplementary Methods**

**Tables S1-S17**

**Figures S1-S10**

**Major Resources Table**

**Supplementary Note**

**Reference 121-125**

## **Supplementary Methods**

### **CVD risk factors measurements in UK Biobank**

Cholesterol and triglyceride were measured using enzymatic assays; High density lipoprotein cholesterol (HDL-C) was measured using an enzyme Immuno-inhibition method while low density lipoprotein cholesterol (LDL-C) was measured using an enzymatic selective protection method<sup>121</sup>. Cholesterol/LDL-C levels of individuals with cholesterol lowering medication at time of inclusion were adjusted by dividing by 0.8/0.7 respectively.

Systolic and diastolic blood pressure were measured twice at a sitting position during participants' visits to assessment centers. The measurements were done first with an automated blood pressure device (Omron 705 IT electronic blood pressure monitor; OMRON Healthcare Europe B.V. Kruisweg 577 2132 NA Hoofddorp) (Field ID 4079, 4080)<sup>122</sup>; In case of unsuccessful automatic measurements, the blood pressures were manually measured by trained nurses (Field ID 93, 94). The average of multiple available measurements was taken as the blood pressure for each participant.

### **eQTL colocalization analysis with summary data based Mendelian randomization (SMR)**

To prioritize genes identified in GWAS, we performed SMR analysis (version 0.710) to test for association between the expression level of each gene and cIMT by using the top-associated expression quantitative trait locus (eQTL) as an instrumental variable<sup>123</sup>. We conducted SMR analysis using the GTEx dataset (v7) but only on tissues relevant to cIMT, namely artery aorta, artery coronary and artery tibial<sup>25</sup>. Genes with p-value ( $P_{SMR}$ ) passing Bonferroni-corrected thresholds, which was corrected based on the number of genes tested, were submitted to HETerogeneity In Dependent Instruments (HEIDI) test. Genes significant at SMR analysis and not rejected by HEIDI test ( $P_{HEIDI} >$ tissue specific Bonferroni-corrected thresholds).

### **Gene expression analysis in single-cell RNA-sequencing data in human carotid atherosclerotic plaques**

The expression levels genes prioritized in GWAS along with other bioinformatic analyses were explored in a RNA-sequencing dataset of carotid artery plaque tissues from 38 patients on a single-cell level with a total of 6191 cells<sup>102</sup>. Analysis was done using PlaqView<sup>124</sup>.

### **Gene prioritization with DEPICT**

we used the bioinformatic tool DEPICT (v1.1beta, obtained from <https://data.broadinstitute.org/mpg/depict/>) to identify candidate causal genes whilst taking gene-gene similarities and LD structures between loci into consideration<sup>125</sup>. Variants at a P-value threshold of  $P < 1 \times 10^{-8}$  were submitted to this analysis.

**Table S1.** Clinical characteristics of the study population at imaging visit

| <b>Characteristics</b>                | <b>All</b>        | <b>Men</b>        | <b>Women</b>      |
|---------------------------------------|-------------------|-------------------|-------------------|
| N                                     | 45185             | 21827             | 23358             |
| Age (years), mean (SD)                | 64.68 (7.72)      | 65.41 (7.81)      | 64.01 (7.56)      |
| Sex (men)                             | 21827 (48.3%)     |                   |                   |
| BMI (kg/m <sup>2</sup> ), mean (SD)   | 26.52 (4.38)      | 26.97 (3.89)      | 26.09 (4.76)      |
| LDL-C in mmol/l, median (IQR) *       | 3.54 (3.00,4.11)  | 3.54 (2.99, 4.10) | 3.54 (3.01, 4.13) |
| HDL-C in mmol/l, median (IQR) *       | 1.43 (1.20,1.70)  | 1.26 (1.09, 1.48) | 1.60 (1.37,1.86)  |
| Cholesterol in mmol/l, median (IQR)*  | 5.68 (4.98, 6.42) | 5.56 (4.85, 6.28) | 5.79 (5.11, 6.55) |
| Triglyceride in mmol/l, median (IQR)* | 1.40 (0.99, 2.02) | 1.63 (1.15, 2.35) | 1.22 (0.90, 1.72) |
| Blood pressure (mm Hg), mean (SD)     |                   |                   |                   |
| Systolic                              | 134.43 (17.96)    | 140.18 (16.15)    | 129.01 (17.88)    |
| Diastolic                             | 79.24 (8.54)      | 81.7 (8.15)       | 76.92 (8.24)      |
| cIMT <sub>min</sub> (mm), mean (SD)   | 0.58 (0.11)       | 0.6 (0.12)        | 0.57 (0.1)        |
| cIMT <sub>mean</sub> (mm), mean (SD)  | 0.69 (0.03)       | 0.71 (0.14)       | 0.67 (0.11)       |
| cIMT <sub>max</sub> (mm), mean (SD)   | 0.8 (0.15)        | 0.83 (0.16)       | 0.77 (0.13)       |
| Ethnicity                             |                   |                   |                   |
| White                                 | 43775 (96.9%)     | 21123 (96.8%)     | 22652 (97.0%)     |
| Asian                                 | 612 (1.4%)        | 356 (1.6%)        | 256 (1.1%)        |
| Black                                 | 291 (0.6%)        | 138 (0.6%)        | 153 (0.7%)        |
| Mixed                                 | 215 (0.5%)        | 77 (0.4%)         | 138 (0.6%)        |
| Other/Unknown                         | 292 (0.6%)        | 133 (0.6%)        | 159 (0.7%)        |
| Current smoker                        | 3165 (7.0%)       | 1814 (8.3%)       | 1348 (5.8%)       |
| Hypertension                          | 15384 (34.0%)     | 8616 (39.5%)      | 6157 (26.4%)      |
| Hyperlipidemia                        | 12763 (28.2%)     | 8082 (37.0%)      | 4681 (20.0%)      |
| Abdominal aortic aneurysm             | 146 (0.3%)        | 127 (0.6%)        | 19 (0.1%)         |
| Cerebral infarction                   | 367 (0.8%)        | 253 (1.2%)        | 114 (0.5%)        |
| Coronary artery disease               | 2718 (6.0%)       | 2073 (9.5%)       | 645 (2.8%)        |
| Peripheral artery disease             | 490 (1.1%)        | 281 (1.3%)        | 209 (0.9%)        |

\* Measurements collected at the baseline visit.

**Table S2.** Variable definitions used in the UK Biobank

| <b>Variable</b>                                              | <b>ICD-9</b>            | <b>ICD-10</b>                             | <b>OPCS-4</b>                                                                                                                                             | <b>Self-reported fields</b>                |
|--------------------------------------------------------------|-------------------------|-------------------------------------------|-----------------------------------------------------------------------------------------------------------------------------------------------------------|--------------------------------------------|
| Abdominal aortic aneurysm                                    | 4414,4413,44102         | I714, I713                                | L183, L184, L185, L186, L193, L194, L195, L196, L271, L272, L275, L281, L282, L464                                                                        | 20002(1492, 1591, 1592), 20004(1104)       |
| Coronary artery disease                                      | 414, 410, 412           | I24, I25, Z955, I21, I22, I23, I252, Z951 | K40, K41, K42, K43, K44, K45, K46, K49, K50, K75                                                                                                          | 20002(1075), 20004(1070, 1095, 1523)       |
| Ischemic stroke                                              | 434                     | I63, I693, G951, H341, H342               |                                                                                                                                                           | 20002(1583)                                |
| Hypertension                                                 | 402, 403, 404, 405, 401 | I11, I12, I13, I15, O10, I10              |                                                                                                                                                           | 20002(1065, 1072)                          |
| Hyperlipidemia                                               | 272                     | E78                                       |                                                                                                                                                           | 20002(1473)                                |
| Peripheral artery disease in extremities (include aneurysms) | 4439                    | I739                                      | L37, L381, L383, L384, L391, L392, L395, L48, L49, L50, L51, L52, L53, L541, L542, L544, L56, L57, L58, L59, L60, L62, L631, L632, L635, L638, L639, L653 | 20002(1087, 1067), 20004(1102, 1103, 1108) |
| Cholesterol lowering medication                              |                         |                                           |                                                                                                                                                           | 6177(1), 6153(1),20003                     |

Variable definitions constructed using ICD-9, ICD-10 and OPCS-4 codes as well as self-reported data fields with disease- or procedure-specific codes between brackets are shown. Abbreviations: ICD, International Classification of Diseases; OPCS, Office of Population, Censuses and Surveys: Classification of interventions and Procedure

**Table S3.** Replication of loci from UK Biobank data in CHARGE/UCLEB consortia meta-analysis

| #   | SNP                     | EA        | CIMT <sub>min</sub> |          | CIMT <sub>mean</sub> |          | CIMT <sub>max</sub> |          | Proxy SNP       | EA | I <sup>2</sup> | Franceschini <i>et al</i> |                 |       | consisten<br>t |
|-----|-------------------------|-----------|---------------------|----------|----------------------|----------|---------------------|----------|-----------------|----|----------------|---------------------------|-----------------|-------|----------------|
|     |                         |           | Beta (SE)           | P        | Beta (SE)            | P        | Beta (SE)           | P        |                 |    |                | Beta (SE)                 | P               | N     |                |
| 1*  | rs222476                | T         | 0.095<br>(0.017)    | 1.60E-08 | 0.086<br>(0.017)     | 2.70E-07 | 0.08<br>(0.017)     | 1.50E-06 |                 | T  | 0              | -0.001<br>(0.0027)        | 8.16E-01        | 64611 | n              |
| 2*  | rs6744377               | T         | 0.046<br>(0.008)    | 6.50E-09 | 0.039<br>(0.008)     | 3.20E-07 | 0.031<br>(0.008)    | 3.90E-05 | rs14420646<br>9 | D  | 17.7           | 0.003<br>(0.001)          | <b>3.41E-03</b> | 57141 | y              |
| 3*  | 2:216300905<br>_ACCCG_A | ACC<br>CG | -0.039<br>(0.006)   | 2.20E-09 | -0.036<br>(0.006)    | 3.30E-09 | -0.032<br>(0.006)   | 3.40E-07 | rs1250237       | T  | 0              | 0.0015<br>(0.0007)        | <b>3.69E-02</b> | 64953 | y              |
| 4*  | rs1553085               | A         | 0.038<br>(0.006)    | 2.60E-09 | 0.038<br>(0.006)     | 6.00E-10 | 0.034<br>(0.006)    | 4.50E-08 |                 | A  | 14.7           | 0.001<br>(0.0008)         | 7.74E-02        | 58694 | y              |
| 5*  | rs6795735               | C         | 0.039<br>(0.006)    | 9.90E-11 | 0.039<br>(0.006)     | 4.20E-11 | 0.035<br>(0.006)    | 3.90E-09 |                 | T  | 24.1           | -0.003<br>(0.0007)        | <b>4.93E-06</b> | 58799 | y              |
| 6*  | rs10305838              | T         | -0.051<br>(0.009)   | 2.10E-10 | -0.052<br>(0.008)    | 7.90E-11 | -0.046<br>(0.008)   | 5.50E-09 |                 | T  | 20.0           | -0.004<br>(0.001)         | <b>7.85E-05</b> | 68002 | y              |
| 7*  | rs4235201               | G         | -0.04<br>(0.007)    | 4.00E-09 | -0.04<br>(0.007)     | 2.40E-09 | -0.039<br>(0.007)   | 1.60E-08 |                 | T  | 0.0            | 0.003<br>(0.0009)         | <b>3.73E-03</b> | 57794 | y              |
| 8   | rs224805                | A         | 0.096<br>(0.014)    | 4.70E-12 | 0.091<br>(0.013)     | 6.30E-12 | 0.079<br>(0.013)    | 2.20E-09 |                 | T  | 1.3            | 0.009<br>(0.0016)         | <b>8.07E-08</b> | 68010 | y              |
| 9   | rs310503                | G         | -0.035<br>(0.006)   | 1.60E-08 | -0.038<br>(0.006)    | 3.80E-10 | -0.037<br>(0.006)   | 2.10E-09 |                 | T  | 14.4           | 0.003<br>(0.0008)         | <b>7.27E-06</b> | 67971 | y              |
| 10* | rs72801051              | A         | -0.043<br>(0.008)   | 1.30E-06 | -0.046<br>(0.008)    | 3.90E-08 | -0.043<br>(0.008)   | 6.00E-07 |                 | A  | 0.0            | -0.001<br>(0.001)         | 4.44E-01        | 67974 | y              |
| 11* | rs11242713              | G         | -0.037<br>(0.006)   | 5.70E-09 | -0.036<br>(0.006)    | 2.20E-09 | -0.034<br>(0.006)   | 5.10E-08 |                 | A  | 0.0            | 0.002<br>(0.0007)         | <b>6.62E-03</b> | 67107 | y              |
| 12  | rs342988                | C         | 0.046<br>(0.007)    | 3.20E-12 | 0.052<br>(0.007)     | 1.70E-15 | 0.054<br>(0.007)    | 2.10E-16 |                 | T  | 7.4            | -0.003<br>(0.0008)        | <b>1.53E-04</b> | 64995 | y              |
| 13  | rs3020263               | G         | 0.056<br>(0.007)    | 2.20E-17 | 0.055<br>(0.007)     | 8.10E-18 | 0.049<br>(0.007)    | 9.30E-14 |                 | A  | 4.3            | -0.004<br>(0.0008)        | <b>2.78E-08</b> | 68003 | y              |
| 14  | rs2980478               | T         | -0.042<br>(0.006)   | 2.70E-12 | -0.041<br>(0.006)    | 4.10E-12 | -0.039<br>(0.006)   | 1.10E-10 | rs2945319       | T  | 0.0            | -0.0018<br>(0.0009)       | 5.66E-02        | 35439 | y              |
| 15  | rs11250097              | T         | 0.045<br>(0.006)    | 2.10E-14 | 0.045<br>(0.006)     | 1.30E-14 | 0.041<br>(0.006)    | 2.00E-12 |                 | T  | 33.3           | 0.004<br>(0.0007)         | <b>8.36E-07</b> | 67107 | y              |
| 16* | rs4739742               | T         | 0.035<br>(0.006)    | 3.80E-09 | 0.032<br>(0.006)     | 4.80E-08 | 0.027<br>(0.006)    | 5.00E-06 |                 | T  | 9.0            | 0.002<br>(0.0008)         | <b>4.82E-03</b> | 57795 | y              |
| 17  | rs10110725              | T         | 0.036<br>(0.006)    | 3.80E-09 | 0.037<br>(0.006)     | 6.10E-10 | 0.034<br>(0.006)    | 1.30E-08 |                 | A  | 36.1           | -0.004<br>(0.0007)        | <b>2.35E-08</b> | 67996 | y              |
| 18  | rs6470156               | G         | -0.056<br>(0.007)   | 2.80E-17 | -0.056<br>(0.007)    | 2.90E-17 | -0.05<br>(0.007)    | 3.80E-14 |                 | A  | 0.0            | 0.003<br>(0.0008)         | <b>4.65E-04</b> | 67952 | y              |

| #   | SNP         | EA | CIMT <sub>min</sub> |          | CIMT <sub>mean</sub> |          | CIMT <sub>max</sub> |          | Proxy SNP | EA | I <sup>2</sup> | Franceschini et al  |                 | N     | consistent |
|-----|-------------|----|---------------------|----------|----------------------|----------|---------------------|----------|-----------|----|----------------|---------------------|-----------------|-------|------------|
|     |             |    | Beta (SE)           | P        | Beta (SE)            | P        | Beta (SE)           | P        |           |    |                | Beta (SE)           | P               |       |            |
| 19* | rs10817556  | C  | -0.037<br>(0.006)   | 2.80E-09 | -0.031<br>(0.006)    | 3.00E-07 | -0.026<br>(0.006)   | 3.00E-05 |           | T  | 0.0            | 0.002<br>(0.0007)   | <b>4.26E-03</b> | 64623 | y          |
| 20* | rs11371318  | G  | -0.028<br>(0.006)   | 5.40E-06 | -0.031<br>(0.006)    | 1.30E-07 | -0.033<br>(0.006)   | 1.20E-08 | rs7907935 | T  | 20.8           | -0.0011<br>(0.0007) | 1.17E-01        | 58645 | y          |
| 21  | rs914279    | T  | 0.039<br>(0.006)    | 4.10E-10 | 0.038<br>(0.006)     | 2.10E-10 | 0.033<br>(0.006)    | 2.60E-08 |           | A  | 5.1            | 0.003<br>(0.0008)   | <b>4.44E-05</b> | 51484 | y          |
| 22  | rs2019090   | A  | 0.041<br>(0.007)    | 1.10E-09 | 0.046<br>(0.006)     | 3.20E-12 | 0.046<br>(0.007)    | 3.80E-12 |           | A  | 25.3           | 0.002<br>(0.0008)   | <b>4.55E-03</b> | 68937 | y          |
| 23* | rs11172113  | T  | -0.042<br>(0.006)   | 4.90E-12 | -0.038<br>(0.006)    | 2.60E-10 | -0.03<br>(0.006)    | 1.40E-06 |           | T  | 28.5           | -0.003<br>(0.0008)  | <b>1.80E-04</b> | 60726 | y          |
| 24* | rs61930625  | C  | -0.029<br>(0.007)   | 9.80E-06 | -0.036<br>(0.007)    | 7.60E-08 | -0.038<br>(0.007)   | 2.80E-08 |           | T  | 0.0            | 0.001<br>(0.0008)   | 1.60E-01        | 62082 | y          |
| 25  | rs9515203   | T  | -0.059<br>(0.007)   | 2.90E-18 | -0.059<br>(0.007)    | 1.50E-18 | -0.056<br>(0.007)   | 9.70E-17 |           | T  | 32.1           | -0.004<br>(0.0009)  | <b>3.12E-06</b> | 61467 | y          |
| 26* | rs2455925   | T  | 0.066<br>(0.01)     | 6.80E-11 | 0.061<br>(0.01)      | 2.60E-10 | 0.05<br>(0.01)      | 3.00E-07 |           | A  | 3.3            | 0.005<br>(0.0013)   | <b>3.54E-04</b> | 55625 | y          |
| 27* | rs4774437   | A  | -0.031<br>(0.006)   | 8.60E-08 | -0.034<br>(0.006)    | 3.00E-09 | -0.032<br>(0.006)   | 1.70E-08 |           | A  | 0.0            | -0.003<br>(0.0007)  | <b>4.44E-05</b> | 65570 | y          |
| 28  | rs1808435   | T  | -0.044<br>(0.006)   | 9.00E-13 | -0.044<br>(0.006)    | 1.30E-13 | -0.04<br>(0.006)    | 2.30E-11 |           | A  | 16.9           | -0.004<br>(0.0007)  | <b>2.74E-07</b> | 67997 | y          |
| 29* | rs7500448   | A  | 0.037<br>(0.007)    | 6.10E-08 | 0.038<br>(0.007)     | 1.60E-08 | 0.035<br>(0.007)    | 5.60E-07 |           | A  | 42.4           | 0.004<br>(0.0009)   | <b>1.71E-05</b> | 62395 | y          |
| 30  | rs488327    | T  | 0.05<br>(0.006)     | 5.00E-16 | 0.049<br>(0.006)     | 1.00E-15 | 0.047<br>(0.006)    | 5.40E-14 |           | T  | 51.7           | 0.004<br>(0.0009)   | <b>1.54E-06</b> | 48337 | y          |
| 31* | rs12051555  | A  | -0.083<br>(0.011)   | 1.10E-14 | -0.083<br>(0.011)    | 5.70E-15 | -0.074<br>(0.011)   | 2.80E-12 |           | A  | 0.0            | -0.005<br>(0.0014)  | <b>7.80E-04</b> | 57795 | y          |
| 32  | rs112009052 | T  | -0.188<br>(0.026)   | 1.30E-12 | -0.183<br>(0.026)    | 3.20E-12 | -0.178<br>(0.026)   | 2.90E-11 |           | A  | 0.0            | 0.01<br>(0.0032)    | <b>2.74E-03</b> | 56919 | y          |
| 33  | rs1065853   | G  | 0.119<br>(0.011)    | 4.40E-27 | 0.126<br>(0.011)     | 4.70E-31 | 0.13<br>(0.011)     | 7.60E-32 | rs7412    | T  | 46.2           | -0.0119<br>(0.0015) | <b>1.01E-14</b> | 56530 | y          |
| 34* | rs6120880   | C  | -0.038<br>(0.006)   | 5.70E-10 | -0.035<br>(0.006)    | 4.30E-09 | -0.033<br>(0.006)   | 5.90E-08 |           | C  | 0.0            | -0.003<br>(0.0007)  | <b>3.06E-04</b> | 68071 | y          |
| 35* | rs5757983   | C  | -0.033<br>(0.006)   | 2.00E-08 | -0.035<br>(0.006)    | 1.10E-09 | -0.033<br>(0.006)   | 1.60E-08 |           | C  | 9.5            | -0.004<br>(0.0007)  | <b>5.29E-07</b> | 62319 | y          |

Chr: Chromosome; EA: Effective allele; I<sup>2</sup>: Heterogeneity I<sup>2</sup> statistics in the meta-analysis; NEA: Non-effective allele; EAF: Effective allele frequency; #: Locus number; \*: novel loci discovered in the current study. Proxy SNP rs144206469, rs1250237, rs2945319, rs7907935 and rs7412 are in high LD (R<sup>2</sup>>0.7) with lead SNP. Marked in bold: associations in CHARGE/UCLEB consortia meta-analysis with P < 0.05.

**Table S4.** Association results of previously reported cIMT loci not replicated in the current UK Biobank sample

| SNP         | Closest gene     | Reported literature        | Chr | Position  | EA | EAF  | cIMT <sub>min</sub> |              | cIMT <sub>mean</sub> |              | cIMT <sub>max</sub> |              |
|-------------|------------------|----------------------------|-----|-----------|----|------|---------------------|--------------|----------------------|--------------|---------------------|--------------|
|             |                  |                            |     |           |    |      | Beta (SE)           | P            | Beta (SE)            | P            | Beta (SE)           | P            |
| rs201648240 | LINC01717        | Franceschini <i>et al.</i> | 1   | 208953176 |    |      |                     |              |                      |              |                     |              |
| rs6907215   | AIG1             | Franceschini <i>et al.</i> | 6   | 143608968 | C  | 0.39 | 0.024<br>(0.006)    | 2.20E-<br>04 | 0.023<br>(0.006)     | 2.80E-<br>04 | 0.019<br>(0.006)    | 4.00E-<br>03 |
| rs13225723  | PIK3CG           | Franceschini <i>et al.</i> | 7   | 106416467 | G  | 0.89 | -0.046<br>(0.011)   | 8.50E-<br>06 | -0.041<br>(0.011)    | 8.10E-<br>05 | -0.034<br>(0.011)   | 1.30E-<br>03 |
| rs11196033  | VT11A            | Franceschini <i>et al.</i> | 10  | 114410998 | C  | 0.50 | 0.002<br>(0.006)    | 6.60E-<br>01 | 0.001<br>(0.006)     | 8.70E-<br>01 | -0.002<br>(0.006)   | 8.00E-<br>01 |
| rs11025608  | PRMT3,<br>SLC6A5 | Strawbridge <i>et al.</i>  | 11  | 20554790  | G  | 0.45 | -0.022<br>(0.006)   | 5.30E-<br>04 | -0.023<br>(0.006)    | 3.00E-<br>04 | -0.023<br>(0.006)   | 3.00E-<br>04 |

Four of five loci was reported in a meta-analysis by Franceschini *et al.*<sup>12</sup>, one of which was not found in current results; the additional locus not replicated was reported in Strawbridge *et al.*<sup>13</sup> using a subset of current sample. Chr: Chromosome; EA: Effective allele; EAF: Effective allele frequency.

**Table S5.** Lead variants in loci associated with  $cIMT_{min}$

| SNP                 | Chr | Position  | EA    | NEA | EAF   | Beta   | SE    | P        | Region | Closest gene      |
|---------------------|-----|-----------|-------|-----|-------|--------|-------|----------|--------|-------------------|
| rs222476            | 2   | 42659267  | T     | C   | 0.03  | 0.095  | 0.017 | 1.60E-08 | p21    | COX7A2L,KCNG3     |
| rs6744377           | 2   | 102069748 | T     | A   | 0.184 | 0.046  | 0.008 | 6.50E-09 | q11.2  | RFX8              |
| 2:216300905_ACCCG_A | 2   | 216300905 | ACCCG | A   | 0.463 | -0.039 | 0.006 | 2.20E-09 | q35    | FN1               |
| rs1553085           | 3   | 21976118  | A     | G   | 0.33  | 0.038  | 0.006 | 2.60E-09 | p24.3  | ZNF385D           |
| rs6795735           | 3   | 64705365  | C     | T   | 0.582 | 0.039  | 0.006 | 9.90E-11 | p14.1  | ADAMTS9           |
| rs10305838          | 4   | 148400256 | T     | C   | 0.855 | -0.051 | 0.009 | 2.10E-10 | q31.22 | EDNRA             |
| rs188848834         | 4   | 174681501 | C     | T   | 0.748 | -0.04  | 0.007 | 3.30E-09 | q34.1  | HAND2             |
| rs224805            | 5   | 81683739  | A     | G   | 0.051 | 0.096  | 0.014 | 4.70E-12 | q14.2  | ATP6AP1L          |
| rs310503            | 5   | 82891552  | G     | T   | 0.661 | -0.035 | 0.006 | 1.60E-08 | q14.2  | VCAN              |
| rs11242713          | 6   | 1668142   | G     | A   | 0.53  | -0.037 | 0.006 | 5.70E-09 | p25.3  | GMDS              |
| rs342988            | 7   | 35467026  | C     | T   | 0.278 | 0.046  | 0.007 | 3.20E-12 | p14.2  | TBX20             |
| rs2912062           | 8   | 6485295   | C     | G   | 0.704 | 0.056  | 0.007 | 1.30E-17 | p23.1  | MCPH1             |
| rs2980478           | 8   | 8088230   | T     | C   | 0.527 | -0.042 | 0.006 | 2.70E-12 | p23.1  | ZNF705B           |
| rs10096511          | 8   | 10810451  | A     | G   | 0.472 | 0.046  | 0.006 | 9.30E-15 | p23.1  | XKR6              |
| rs4739742           | 8   | 81308435  | T     | C   | 0.558 | 0.035  | 0.006 | 3.80E-09 | q21.13 | ZBTB10            |
| 8:123413770_GA_G    | 8   | 123413770 | GA    | G   | 0.545 | 0.036  | 0.006 | 2.60E-09 | q24.13 | ZHX2              |
| rs6470156           | 8   | 124579985 | G     | A   | 0.721 | -0.056 | 0.007 | 2.80E-17 | q24.13 | FBXO32            |
| rs10817556          | 9   | 116775859 | C     | T   | 0.661 | -0.037 | 0.006 | 2.80E-09 | q32    | ZNF618            |
| rs914279            | 10  | 30170487  | T     | G   | 0.416 | 0.039  | 0.006 | 4.10E-10 | p11.23 | JCAD              |
| rs2019090           | 11  | 103668962 | A     | T   | 0.294 | 0.041  | 0.007 | 1.10E-09 | q22.3  | PDGFD             |
| rs11172113          | 12  | 57527283  | T     | C   | 0.59  | -0.042 | 0.006 | 4.90E-12 | q13.3  | STAT6,LRP1        |
| rs9515203           | 13  | 111049623 | T     | C   | 0.741 | -0.059 | 0.007 | 2.90E-18 | q34    | COL4A2            |
| rs2455925           | 15  | 48893649  | T     | C   | 0.906 | 0.066  | 0.01  | 6.80E-11 | q21.1  | FBN1              |
| rs35633915          | 16  | 75408954  | T     | TA  | 0.411 | -0.044 | 0.006 | 8.20E-13 | q23.1  | CFDP1             |
| rs488327            | 16  | 88989005  | T     | C   | 0.662 | 0.05   | 0.006 | 5.00E-16 | q24.3  | CBFA2T3           |
| rs12051555          | 17  | 12447601  | A     | C   | 0.917 | -0.083 | 0.011 | 1.10E-14 | p12    | MYOCD             |
| rs112009052         | 19  | 41099501  | T     | A   | 0.986 | -0.188 | 0.026 | 1.30E-12 | q13.2  | SHKBP1,LTBP4      |
| rs1065853           | 19  | 45413233  | G     | T   | 0.921 | 0.119  | 0.011 | 4.40E-27 | q13.32 | TOMM40,APOE,APOC1 |
| rs6120880           | 20  | 33829406  | C     | G   | 0.568 | -0.038 | 0.006 | 5.70E-10 | q11.22 | EDEM2,MMP24       |
| rs5757983           | 22  | 40920236  | C     | G   | 0.468 | -0.033 | 0.006 | 2.00E-08 | q13.2  | MRTFA             |

Chr: Chromosome; EA: Effective allele; NEA: Non-effective allele; EAF: Effective allele frequency.



**Table S6.** Lead variants in loci associated with  $cIMT_{mean}$

| SNP                             | Chr | Position  | EA                    | NEA      | EAF   | Beta   | SE    | P        | Region | Closest gene                  |
|---------------------------------|-----|-----------|-----------------------|----------|-------|--------|-------|----------|--------|-------------------------------|
| 2:216300905_ACCCG_A             | 2   | 216300905 | ACCCG                 | A        | 0.463 | -0.036 | 0.006 | 3.30E-09 | q35    | <i>FN1</i>                    |
| rs1553085                       | 3   | 21976118  | A                     | G        | 0.33  | 0.038  | 0.006 | 6.00E-10 | p24.3  | <i>ZNF385D</i>                |
| rs6795735                       | 3   | 64705365  | C                     | T        | 0.582 | 0.039  | 0.006 | 4.20E-11 | p14.1  | <i>ADAMTS9</i>                |
| rs10305838                      | 4   | 148400256 | T                     | C        | 0.855 | -0.052 | 0.008 | 7.90E-11 | q31.22 | <i>EDNRA</i>                  |
| rs4235201                       | 4   | 174677572 | G                     | T        | 0.759 | -0.04  | 0.007 | 2.40E-09 | q34.1  | <i>HAND2</i>                  |
| rs224805                        | 5   | 81683739  | A                     | G        | 0.051 | 0.091  | 0.013 | 6.30E-12 | q14.2  | <i>ATP6AP1L</i>               |
| rs310503                        | 5   | 82891552  | G                     | T        | 0.661 | -0.038 | 0.006 | 3.80E-10 | q14.2  | <i>VCAN</i>                   |
| rs72801051                      | 5   | 142685670 | A                     | T        | 0.84  | -0.046 | 0.008 | 3.90E-08 | q31.3  | <i>NR3C1</i>                  |
| rs11242713                      | 6   | 1668142   | G                     | A        | 0.53  | -0.036 | 0.006 | 2.20E-09 | p25.3  | <i>GMDS</i>                   |
| rs342988                        | 7   | 35467026  | C                     | T        | 0.278 | 0.052  | 0.007 | 1.70E-15 | p14.2  | <i>TBX20</i>                  |
| rs3020263                       | 8   | 6487449   | G                     | A        | 0.718 | 0.055  | 0.007 | 8.10E-18 | p23.1  | <i>MCPH1</i>                  |
| rs2980478                       | 8   | 8088230   | T                     | C        | 0.527 | -0.041 | 0.006 | 4.10E-12 | p23.1  | <i>ZNF705B</i>                |
| rs4314618                       | 8   | 10816772  | A                     | G        | 0.471 | 0.045  | 0.006 | 1.10E-14 | p23.1  | <i>XKR6</i>                   |
| rs9632837                       | 8   | 81318125  | C                     | G        | 0.578 | 0.033  | 0.006 | 3.10E-08 | q21.13 | <i>ZBTB10</i>                 |
| rs10110725                      | 8   | 123415086 | T                     | A        | 0.543 | 0.037  | 0.006 | 6.10E-10 | q24.13 | <i>ZHX2</i>                   |
| rs6470156                       | 8   | 124579985 | G                     | A        | 0.721 | -0.056 | 0.007 | 2.90E-17 | q24.13 | <i>FBXO32</i>                 |
| rs914279                        | 10  | 30170487  | T                     | G        | 0.416 | 0.038  | 0.006 | 2.10E-10 | p11.23 | <i>JCAD</i>                   |
| rs796784254                     | 11  | 103669291 | T                     | TTATTGAA | 0.295 | 0.046  | 0.006 | 3.00E-12 | q22.3  | <i>PDGFD</i>                  |
| rs11172113                      | 12  | 57527283  | T                     | C        | 0.59  | -0.038 | 0.006 | 2.60E-10 | q13.3  | <i>STAT6,LRP1</i>             |
| rs9515203                       | 13  | 111049623 | T                     | C        | 0.741 | -0.059 | 0.007 | 1.50E-18 | q34    | <i>COL4A2</i>                 |
| 15:48737340_CACATAT<br>ATATAT_C | 15  | 48737340  | CACATA<br>TATATA<br>T | C        | 0.908 | 0.063  | 0.01  | 1.50E-10 | q21.1  | <i>FBN1</i>                   |
| rs4774437                       | 15  | 62834113  | A                     | G        | 0.543 | -0.034 | 0.006 | 3.00E-09 | q22.2  | <i>TLN2</i>                   |
| rs1808435                       | 16  | 75425819  | T                     | C        | 0.411 | -0.044 | 0.006 | 1.30E-13 | q23.1  | <i>CFDP1</i>                  |
| rs7500448                       | 16  | 83045790  | A                     | G        | 0.75  | 0.038  | 0.007 | 1.60E-08 | q23.3  | <i>CDH13</i>                  |
| rs488327                        | 16  | 88989005  | T                     | C        | 0.662 | 0.049  | 0.006 | 1.00E-15 | q24.3  | <i>CBFA2T3</i>                |
| rs12051555                      | 17  | 12447601  | A                     | C        | 0.917 | -0.083 | 0.011 | 5.70E-15 | p12    | <i>MYOCD</i>                  |
| rs112009052                     | 19  | 41099501  | T                     | A        | 0.986 | -0.183 | 0.026 | 3.20E-12 | q13.2  | <i>SHKBP1,LTBP4</i>           |
| rs1065853                       | 19  | 45413233  | G                     | T        | 0.921 | 0.126  | 0.011 | 4.70E-31 | q13.32 | <i>TOMM40,APOE,<br/>APOC1</i> |

| <b>SNP</b> | <b>Chr</b> | <b>Position</b> | <b>EA</b> | <b>NEA</b> | <b>EAF</b> | <b>Beta</b> | <b>SE</b> | <b>P</b> | <b>Region</b> | <b>Closest gene</b> |
|------------|------------|-----------------|-----------|------------|------------|-------------|-----------|----------|---------------|---------------------|
| rs6120880  | 20         | 33829406        | C         | G          | 0.568      | -0.035      | 0.006     | 4.30E-09 | q11.22        | <i>EDEM2,MMP24</i>  |
| rs5757983  | 22         | 40920236        | C         | G          | 0.468      | -0.035      | 0.006     | 1.10E-09 | q13.2         | <i>MRTFA</i>        |

Chr: Chromosome; EA: Effective allele; NEA: Non-effective allele; EAF: Effective allele frequency.

**Table S7.** Lead variants in loci associated with  $cIMT_{max}$

| SNP         | Chr | Position  | EA | NEA      | EAF   | Beta   | SE    | P        | Region | Closest gene             |
|-------------|-----|-----------|----|----------|-------|--------|-------|----------|--------|--------------------------|
| rs7628630   | 3   | 21977337  | G  | A        | 0.329 | 0.034  | 0.006 | 4.20E-08 | p24.3  | <i>ZNF385D</i>           |
| rs4611812   | 3   | 64699445  | C  | T        | 0.584 | 0.035  | 0.006 | 3.70E-09 | p14.1  | <i>ADAMTS9</i>           |
| rs10305838  | 4   | 148400256 | T  | C        | 0.855 | -0.046 | 0.008 | 5.50E-09 | q31.22 | <i>EDNRA</i>             |
| rs4235201   | 4   | 174677572 | G  | T        | 0.759 | -0.039 | 0.007 | 1.60E-08 | q34.1  | <i>HAND2</i>             |
| rs224805    | 5   | 81683739  | A  | G        | 0.051 | 0.079  | 0.013 | 2.20E-09 | q14.2  | <i>ATP6AP1L</i>          |
| rs310503    | 5   | 82891552  | G  | T        | 0.661 | -0.037 | 0.006 | 2.10E-09 | q14.2  | <i>VCAN</i>              |
| rs342988    | 7   | 35467026  | C  | T        | 0.278 | 0.054  | 0.007 | 2.10E-16 | p14.2  | <i>TBX20</i>             |
| rs3020263   | 8   | 6487449   | G  | A        | 0.718 | 0.049  | 0.007 | 9.30E-14 | p23.1  | <i>MCPH1</i>             |
| rs2980478   | 8   | 8088230   | T  | C        | 0.527 | -0.039 | 0.006 | 1.10E-10 | p23.1  | <i>ZNF705B</i>           |
| rs11250097  | 8   | 10811829  | T  | C        | 0.467 | 0.041  | 0.006 | 2.00E-12 | p23.1  | <i>XKR6</i>              |
| rs10110725  | 8   | 123415086 | T  | A        | 0.543 | 0.034  | 0.006 | 1.30E-08 | q24.13 | <i>ZHX2</i>              |
| rs6470156   | 8   | 124579985 | G  | A        | 0.721 | -0.05  | 0.007 | 3.80E-14 | q24.13 | <i>FBXO32</i>            |
| rs11371318  | 10  | 28230429  | G  | GAA      | 0.509 | -0.033 | 0.006 | 1.20E-08 | p12.1  | <i>ARMC4</i>             |
| rs2150562   | 10  | 30162423  | A  | G        | 0.311 | 0.037  | 0.006 | 7.40E-09 | p11.23 | <i>SVIL</i>              |
| rs796784254 | 11  | 103669291 | T  | TTATTGAA | 0.295 | 0.046  | 0.007 | 3.10E-12 | q22.3  | <i>PDGFD</i>             |
| rs61930625  | 12  | 86167409  | C  | T        | 0.755 | -0.038 | 0.007 | 2.80E-08 | q21.31 | <i>RASSF9</i>            |
| rs9515203   | 13  | 111049623 | T  | C        | 0.741 | -0.056 | 0.007 | 9.70E-17 | q34    | <i>COL4A2</i>            |
| rs7176966   | 15  | 62817568  | A  | G        | 0.536 | -0.033 | 0.006 | 1.30E-08 | q22.2  | <i>TLN2</i>              |
| rs1808435   | 16  | 75425819  | T  | C        | 0.411 | -0.04  | 0.006 | 2.30E-11 | q23.1  | <i>CFDP1</i>             |
| rs488327    | 16  | 88989005  | T  | C        | 0.662 | 0.047  | 0.006 | 5.40E-14 | q24.3  | <i>CBFA2T3</i>           |
| rs740854    | 17  | 12449192  | A  | G        | 0.915 | -0.074 | 0.011 | 2.40E-12 | p12    | <i>MYOCD</i>             |
| rs111689747 | 19  | 41333152  | G  | A        | 0.988 | -0.189 | 0.028 | 2.10E-11 | q13.2  | <i>CYP2A6</i>            |
| rs1065853   | 19  | 45413233  | G  | T        | 0.921 | 0.13   | 0.011 | 7.60E-32 | q13.32 | <i>TOMM40,APOE,APOC1</i> |
| rs369739453 | 20  | 32968411  | CT | C        | 0.563 | 0.038  | 0.007 | 5.60E-09 | q11.22 | <i>ITCH</i>              |
| rs5757983   | 22  | 40920236  | C  | G        | 0.468 | -0.033 | 0.006 | 1.60E-08 | q13.2  | <i>MRTFA</i>             |

Chr: Chromosome; EA: Effective allele; NEA: Non-effective allele; EAF: Effective allele frequency.

**Table S8.** Variants identified by FINEMAP associated with  $cIMT_{mean}$ 

| #  | Sentinel SNP            | Chr | Position  | Gene closest to sentinel SNP | Variants identified by FINEMAP    | Gene closest to variants identified by FINEMAP        | Coding variants (gene)                              |
|----|-------------------------|-----|-----------|------------------------------|-----------------------------------|-------------------------------------------------------|-----------------------------------------------------|
| 1  | rs222476                | 2   | 42659267  | <i>COX7A2L, KCNG3</i>        | rs6736913                         | <i>EML4</i>                                           | NP_061936.3:<br>p.Lys283Gln/Glu/Ter ( <i>EML4</i> ) |
| 2  | rs6744377               | 2   | 102069748 | <i>RFX8</i>                  | 2:102054690_AT_A<br>rs6543078     | <i>RFX8</i><br><i>RFX8</i>                            | XP_011510074.1:p.Tyr65Cys/Phe/Ser ( <i>RFX8</i> )   |
| 3  | 2:216300905_AC<br>CCG_A | 2   | 216300905 | <i>FN1</i>                   | 2:216300905_ACC<br>G_A            | <i>FN1</i>                                            |                                                     |
| 4  | rs1553085               | 3   | 21976118  | <i>ZNF385D</i>               | rs1553085                         | <i>ZNF385D</i>                                        |                                                     |
| 5  | rs6795735               | 3   | 64705365  | <i>ADAMTS9</i>               | rs67311847<br>rs71300731          | <i>ADAMTS9</i><br><i>ADAMTS9</i>                      |                                                     |
| 6  | rs10305838              | 4   | 148400256 | <i>EDNRA</i>                 | rs10305838                        | <i>EDNRA</i>                                          |                                                     |
| 7  | rs4235201               | 4   | 174677572 | <i>HAND2</i>                 | rs4235201                         | <i>HAND2</i>                                          |                                                     |
| 8  | rs224805                | 5   | 81683739  | <i>ATP6AP1L</i>              | rs226208<br>rs224805<br>rs7702764 | <i>ATP6AP1L</i><br><i>ATP6AP1L</i><br><i>ATP6AP1L</i> |                                                     |
| 9  | rs310503                | 5   | 82891552  | <i>VCAN</i>                  | rs310503<br>rs1563553             | <i>VCAN</i><br><i>HAPLN1</i>                          |                                                     |
| 10 | rs72801051              | 5   | 142685670 | <i>NR3C1</i>                 | rs258811<br>rs72801051            | <i>ARHGAP26</i><br><i>NR3C1</i>                       | NP_001018084.1:p.Asn766<br>Lys ( <i>NR3C1</i> )     |
| 11 | rs11242713              | 6   | 1668142   | <i>GMDS</i>                  | rs11242713<br>rs9392347           | <i>GMDS</i><br><i>GMDS</i>                            |                                                     |
| 12 | rs342988                | 7   | 35467026  | <i>TBX20</i>                 | rs342988                          | <i>TBX20</i>                                          |                                                     |
| 13 | rs3020263               | 8   | 6487449   | <i>MCPH1</i>                 | rs3020263                         | <i>MCPH1</i>                                          |                                                     |
| 14 | rs2980478               | 8   | 8088230   | <i>ZNF705B</i>               | rs2980478                         | <i>ZNF705B</i>                                        |                                                     |
| 15 | rs4314618               | 8   | 10816772  | <i>XKR6</i>                  | rs4314618                         | <i>XKR6</i>                                           |                                                     |
| 16 | rs9632837               | 8   | 81318125  | <i>ZBTB10</i>                | rs9632837                         | <i>ZBTB10</i>                                         |                                                     |
| 17 | rs10110725              | 8   | 123415086 | <i>ZHX2</i>                  | 8:123413770_GA_G                  | <i>ZHX2</i>                                           |                                                     |
| 18 | rs6470156               | 8   | 124579985 | <i>FBXO32</i>                | rs6470156                         | <i>FBXO32</i>                                         |                                                     |

| #  | SNP                                 | Chr | Position  | Gene closest to sentinel SNP | Variants identified by FINEMAP                      | Gene closest to variants identified by FINEMAP                | Coding variants (gene)                                                                            |
|----|-------------------------------------|-----|-----------|------------------------------|-----------------------------------------------------|---------------------------------------------------------------|---------------------------------------------------------------------------------------------------|
| 19 | rs10817556                          | 9   | 116775859 | <i>ZNF618</i>                | rs10982031                                          | <i>ZNF618</i>                                                 | NP_001304969.1:p.Tyr115Ter ( <i>ZNF618</i> ),<br>NP_001304969.1:p.Cys299Ter/Trp ( <i>ZNF618</i> ) |
| 20 | rs11371318                          | 10  | 28230429  | <i>ARMC4</i>                 | rs11371318                                          | <i>ARMC4</i>                                                  | NP_060546.2:p.Asn686Lys ( <i>ARMC4</i> )                                                          |
| 21 | rs914279                            | 10  | 30170487  | <i>JCAD</i>                  | rs914279                                            | <i>JCAD</i>                                                   | NP_065899.1:p.His668Gln ( <i>JCAD</i> )                                                           |
| 22 | rs796784254                         | 11  | 103669291 | <i>PDGFD</i>                 | rs9337951<br>rs796784254                            | <i>JCAD</i><br><i>PDGFD</i>                                   |                                                                                                   |
| 23 | rs11172113                          | 12  | 57527283  | <i>STAT6, LRP1</i>           | rs36179007<br>rs11172113                            | <i>PDGFD</i><br><i>LRP1</i>                                   | NP_005529.1:p.Arg322Gln/Pro/Leu ( <i>INHBC</i> )                                                  |
| 24 | rs61930625                          | 12  | 86167409  | <i>RASSF9</i>                | rs7484541<br>rs17345028                             | <i>R3HDM2</i><br><i>RASSF9</i>                                |                                                                                                   |
| 25 | rs9515203                           | 13  | 111049623 | <i>COL4A2</i>                | rs12429386<br>rs9515203                             | <i>COL4A1</i><br><i>COL4A2</i>                                |                                                                                                   |
| 26 | 15:48737340_CA<br>CATATATATAT_<br>C | 15  | 48737340  | <i>FBN1</i>                  | rs1678982                                           | <i>FBN1</i>                                                   |                                                                                                   |
| 27 | rs4774437                           | 15  | 62834113  | <i>TLN2</i>                  | rs12441323                                          | <i>TLN2</i>                                                   |                                                                                                   |
| 28 | rs1808435                           | 16  | 75425819  | <i>CFDP1</i>                 | rs4888367<br>rs35633915                             | <i>BCAR1</i><br><i>CFDP1</i>                                  |                                                                                                   |
| 29 | rs7500448                           | 16  | 83045790  | <i>CDH13</i>                 | rs7500448<br>rs8059012                              | <i>CDH13</i><br><i>CDH13</i>                                  |                                                                                                   |
| 30 | rs488327                            | 16  | 88989005  | <i>CBFA2T3</i>               | rs488327                                            | <i>CBFA2T3</i>                                                |                                                                                                   |
| 31 | rs12051555                          | 17  | 12447601  | <i>MYOCD</i>                 | rs4442861<br>rs12051555<br>rs35712872<br>rs12150137 | <i>MAP2K4</i><br><i>MYOCD</i><br><i>MYOCD</i><br><i>MYOCD</i> |                                                                                                   |
| 32 | rs112009052                         | 19  | 41099501  | <i>SHKBP1, LTBP4</i>         | rs112009052                                         | <i>LTBP4</i>                                                  |                                                                                                   |

| #         | SNP       | Chr | Position | Gene closest to sentinel SNP | Variants identified by FINEMAP | Gene closest to variants identified by FINEMAP | Coding variants (gene)                              |
|-----------|-----------|-----|----------|------------------------------|--------------------------------|------------------------------------------------|-----------------------------------------------------|
| <b>33</b> | rs1065853 | 19  | 45413233 | <i>TOMM40, APOE, APOC1</i>   | rs1065853                      | <i>APOE</i>                                    | NP_001289617.1:p.Arg202 Cys/Gly/Ser ( <i>APOE</i> ) |
|           |           |     |          |                              | rs56131196                     | <i>APOC1</i>                                   |                                                     |
| <b>34</b> | rs6120880 | 20  | 33829406 | <i>EDEM2, MMP24</i>          | rs6120880                      | <i>MMP24</i>                                   |                                                     |
| <b>35</b> | rs5757983 | 22  | 40920236 | <i>MRTFA</i>                 | rs5757983                      | <i>MRTFA</i>                                   |                                                     |

Chr: Chromosome; #: Locus number. Coding variants (gene): coding variants that are in high LD ( $r^2 > 0.8$ ) with the variant identified by FINEMAP.

**Table S9.** cIMT loci with sex difference

| Chr                        | SNP        | EAF <sub>female</sub> | EAF <sub>male</sub> | INFO | Beta <sub>female</sub> | SE <sub>female</sub> | P <sub>female</sub> | Beta <sub>male</sub> | SE <sub>male</sub> | P <sub>male</sub> | T <sub>int</sub> | P <sub>sexdiff</sub> | Gene                  |
|----------------------------|------------|-----------------------|---------------------|------|------------------------|----------------------|---------------------|----------------------|--------------------|-------------------|------------------|----------------------|-----------------------|
| <b>cIMT<sub>min</sub></b>  |            |                       |                     |      |                        |                      |                     |                      |                    |                   |                  |                      |                       |
| 8                          | rs1834451  | 0.61                  | 0.62                | 0.99 | 0.020                  | 0.008                | 0.0096              | 0.069                | 0.010              | <b>7.3E-13</b>    | -3.98            | <b>6.81E-05</b>      | <i>MCPH1</i>          |
| <b>cIMT<sub>mean</sub></b> |            |                       |                     |      |                        |                      |                     |                      |                    |                   |                  |                      |                       |
| 8                          | rs12543564 | 0.67                  | 0.67                | 0.97 | 0.020                  | 0.008                | 0.0084              | 0.066                | 0.010              | <b>2E-11</b>      | -3.67            | <b>2.44E-04</b>      | <i>MCPH1</i>          |
| 8                          | rs71217283 | 0.58                  | 0.59                | 0.91 | -0.016                 | 0.008                | 0.061               | -0.058               | 0.010              | <b>2.2E-09</b>    | 3.42             | <b>6.36E-04</b>      | <i>ZNF705B</i>        |
| 8                          | rs10100333 | 0.39                  | 0.39                | 0.98 | 0.009                  | 0.008                | 0.22                | 0.053                | 0.009              | <b>1.5E-08</b>    | -3.69            | <b>2.23E-04</b>      | <i>SOX7</i>           |
| 8                          | rs745379   | 0.50                  | 0.49                | 1.00 | 0.008                  | 0.008                | 0.33                | 0.053                | 0.009              | <b>7.8E-09</b>    | -3.87            | <b>1.09E-04</b>      | <i>GATA4, C8orf49</i> |
| 14                         | rs1187729  | 0.58                  | 0.59                | 1.00 | -0.007                 | 0.008                | 0.33                | 0.051                | 0.009              | <b>3.3E-08</b>    | -4.93            | <b>8.35E-07</b>      | <i>SYNE3</i>          |
| <b>cIMT<sub>max</sub></b>  |            |                       |                     |      |                        |                      |                     |                      |                    |                   |                  |                      |                       |
| 5                          | rs7447467  | 0.51                  | 0.51                | 0.99 | -0.043                 | 0.008                | <b>3.5E-08</b>      | -0.005               | 0.009              | 0.62              | -3.27            | <b>1.08E-03</b>      | <i>HAPLN1</i>         |
| 8                          | rs71217283 | 0.58                  | 0.59                | 0.91 | -0.013                 | 0.008                | 0.1                 | -0.058               | 0.010              | <b>1.9E-09</b>    | 3.59             | <b>3.35E-04</b>      | <i>ZNF705B</i>        |
| 8                          | rs7005905  | 0.38                  | 0.38                | 0.98 | 0.008                  | 0.008                | 0.29                | 0.051                | 0.009              | <b>4.5E-08</b>    | -3.52            | <b>4.30E-04</b>      | <i>SOX7</i>           |
| 8                          | rs745379   | 0.50                  | 0.49                | 1.00 | 0.008                  | 0.008                | 0.31                | 0.051                | 0.009              | <b>2.6E-08</b>    | -3.64            | <b>2.71E-04</b>      | <i>GATA4, C8orf49</i> |
| 17                         | rs80019927 | 0.75                  | 0.75                | 0.95 | -0.052                 | 0.009                | <b>1.7E-08</b>      | -0.003               | 0.011              | 0.81              | -3.54            | <b>3.96E-04</b>      | <i>MAP2K4</i>         |

Chr: Chromosome; EA: Effective allele; NEA: Non-effective allele; EAF: Effective allele frequency; Tint: t test statistics of the interaction analysis; P<sub>sexdiff</sub>: P for sex interaction test.

**Table S10.** Cross-tissue TWAS associations at  $P < 3.33 \times 10^{-6}$ 

| Gene     | Chr | CIMT <sub>min</sub> |                 | CIMT <sub>mean</sub> |                 | CIMT <sub>max</sub> |                 |
|----------|-----|---------------------|-----------------|----------------------|-----------------|---------------------|-----------------|
|          |     | Test score          | P               | Test score           | P               | Test score          | P               |
| ASAP2    | 2   | 13.66               | <b>8.32E-07</b> | 8.96                 | 1.01E-04        | 5.00                | 6.52E-03        |
| SH3RF3   | 2   | 6.37                | 1.20E-03        | 12.21                | <b>2.54E-06</b> | 11.00               | 9.03E-06        |
| XRCC4    | 5   | 13.27               | <b>1.38E-06</b> | 14.74                | <b>3.08E-07</b> | 14.45               | <b>4.12E-07</b> |
| MFHAS1   | 8   | 21.24               | <b>3.11E-10</b> | 20.75                | <b>5.03E-10</b> | 17.20               | <b>1.73E-08</b> |
| ERI1     | 8   | 25.31               | <b>4.44E-12</b> | 23.25                | <b>2.43E-11</b> | 19.47               | <b>8.06E-10</b> |
| PPP1R3B  | 8   | 21.37               | <b>3.98E-10</b> | 20.34                | <b>1.18E-09</b> | 16.11               | <b>9.26E-08</b> |
| TNKS     | 8   | 17.13               | <b>2.12E-08</b> | 17.32                | <b>1.74E-08</b> | 14.99               | <b>2.06E-07</b> |
| MSRA     | 8   | 19.04               | <b>2.30E-09</b> | 17.46                | <b>1.06E-08</b> | 14.17               | <b>3.22E-07</b> |
| SOX7     | 8   | 156.95              | <b>8.40E-11</b> | 29.85                | <b>1.13E-13</b> | 23.04               | <b>1.03E-10</b> |
| PINX1    | 8   | 359.34              | <b>1.81E-11</b> | 361.45               | <b>1.81E-11</b> | 311.12              | <b>1.81E-11</b> |
| XKR6     | 8   | 223.65              | <b>2.18E-11</b> | 215.65               | <b>2.18E-11</b> | 186.46              | <b>2.19E-11</b> |
| MTMR9    | 8   | 28.41               | <b>7.19E-13</b> | 28.97                | <b>4.35E-13</b> | 23.63               | <b>5.72E-11</b> |
| SLC35G5  | 8   | 392.60              | <b>1.78E-11</b> | 384.30               | <b>1.78E-11</b> | 25.69               | <b>4.26E-12</b> |
| C8orf12  | 8   | 17.10               | <b>1.67E-08</b> | 17.29                | <b>1.38E-08</b> | 15.03               | <b>1.37E-07</b> |
| FAM167A  | 8   | 26.74               | <b>5.60E-12</b> | 27.95                | <b>2.09E-12</b> | 22.84               | <b>1.47E-10</b> |
| BLK      | 8   | 84.07               | <b>1.10E-11</b> | 85.90                | <b>1.09E-11</b> | 29.99               | <b>4.11E-14</b> |
| GATA4    | 8   | 18.11               | <b>1.43E-08</b> | 16.49                | <b>7.45E-08</b> | 14.31               | <b>6.82E-07</b> |
| C8orf49  | 8   | 12.50               | <b>1.79E-06</b> | 13.39                | <b>7.27E-07</b> | 11.30               | 5.99E-06        |
| NEIL2    | 8   | 16.59               | <b>1.24E-08</b> | 16.42                | <b>1.49E-08</b> | 13.11               | <b>5.22E-07</b> |
| DEFB134  | 8   | 26.70               | <b>1.31E-12</b> | 28.99                | <b>1.37E-13</b> | 25.48               | <b>4.33E-12</b> |
| FAM86B1  | 8   | 17.25               | <b>8.50E-09</b> | 18.08                | <b>3.76E-09</b> | 15.45               | <b>5.28E-08</b> |
| FAM86B2  | 8   | 24.66               | <b>1.26E-11</b> | 29.00                | <b>3.79E-13</b> | 22.91               | <b>5.50E-11</b> |
| GTF2E2   | 8   | 13.31               | <b>1.45E-06</b> | 12.21                | 4.66E-06        | 8.91                | 1.57E-04        |
| SFRP5    | 10  | 13.16               | <b>2.02E-06</b> | 9.96                 | 5.07E-05        | 8.84                | 1.60E-04        |
| ARHGAP42 | 11  | 12.70               | <b>1.11E-06</b> | 15.46                | <b>6.03E-08</b> | 11.62               | 3.58E-06        |
| TMEM133  | 11  | 10.05               | 1.73E-05        | 13.46                | <b>4.58E-07</b> | 10.73               | 8.61E-06        |
| PDGFD    | 11  | 16.96               | <b>2.49E-08</b> | 24.11                | <b>1.82E-11</b> | 26.84               | <b>1.09E-12</b> |
| COQ10A   | 12  | 21.33               | <b>5.40E-10</b> | 23.17                | <b>8.83E-11</b> | 18.64               | <b>7.46E-09</b> |
| LRP1     | 12  | 30.64               | <b>5.44E-14</b> | 22.97                | <b>7.32E-11</b> | 12.39               | 3.12E-06        |
| TLN2     | 15  | 13.02               | <b>1.41E-06</b> | 16.52                | <b>4.02E-08</b> | 13.41               | <b>9.47E-07</b> |
| RFWD3    | 16  | 11.68               | <b>2.84E-06</b> | 10.03                | 1.57E-05        | 8.05                | 1.18E-04        |
| LDHD     | 16  | 20.17               | <b>1.92E-09</b> | 19.30                | <b>4.44E-09</b> | 13.02               | <b>1.97E-06</b> |
| BCAR1    | 16  | 28.98               | <b>6.60E-13</b> | 308.52               | <b>3.04E-11</b> | 22.41               | <b>1.34E-10</b> |
| CFDP1    | 16  | 23.10               | <b>2.49E-11</b> | 421.76               | <b>2.12E-11</b> | 19.78               | <b>4.99E-10</b> |
| TMEM170A | 16  | 256.66              | <b>1.05E-11</b> | 274.30               | <b>1.05E-11</b> | 23.49               | <b>3.37E-11</b> |
| CDH13    | 16  | 22.01               | <b>2.04E-10</b> | 26.97                | <b>1.38E-12</b> | 22.75               | <b>9.67E-11</b> |
| MVD      | 16  | 19.01               | <b>3.87E-09</b> | 20.39                | <b>9.40E-10</b> | 15.77               | <b>1.04E-07</b> |
| CBFA2T3  | 16  | 28.63               | <b>1.04E-13</b> | 27.85                | <b>2.27E-13</b> | 25.68               | <b>2.06E-12</b> |
| KANK2    | 19  | 9.71                | 3.42E-05        | 12.39                | <b>2.28E-06</b> | 13.14               | <b>1.08E-06</b> |
| PVRL2    | 19  | 10.76               | 1.43E-05        | 14.97                | <b>2.04E-07</b> | 16.36               | <b>5.07E-08</b> |
| ZNF296   | 19  | 11.66               | 8.52E-06        | 16.71                | <b>6.78E-08</b> | 15.46               | <b>2.22E-07</b> |
| DMPK     | 19  | 9.54                | 2.29E-05        | 12.25                | <b>1.44E-06</b> | 10.55               | 8.23E-06        |
| DMWD     | 19  | 7.85                | 1.90E-04        | 11.92                | <b>2.71E-06</b> | 10.16               | 1.76E-05        |



| Gene          | Chr | CIMT <sub>min</sub> |                 | CIMT <sub>mean</sub> |                 | CIMT <sub>max</sub> |                 |
|---------------|-----|---------------------|-----------------|----------------------|-----------------|---------------------|-----------------|
|               |     | Test score          | <i>P</i>        | Test score           | <i>P</i>        | Test score          | <i>P</i>        |
| <i>ZNF341</i> | 20  | 11.33               | 7.34E-06        | 12.32                | <b>2.54E-06</b> | 11.08               | 9.55E-06        |
| <i>ITCH</i>   | 20  | 12.46               | 3.82E-06        | 13.77                | <b>9.56E-07</b> | 13.47               | <b>1.32E-06</b> |
| <i>MMP24</i>  | 20  | 14.07               | <b>4.79E-07</b> | 15.88                | <b>7.72E-08</b> | 13.80               | <b>6.27E-07</b> |
| <i>FAM83C</i> | 20  | 15.49               | <b>2.21E-08</b> | 13.73                | <b>1.46E-07</b> | 12.36               | <b>6.14E-07</b> |
| <i>GDF5OS</i> | 20  | 12.54               | 3.67E-06        | 12.36                | 4.42E-06        | 13.11               | <b>2.09E-06</b> |
| <i>GDF5</i>   | 20  | 14.54               | <b>3.58E-07</b> | 13.76                | <b>8.32E-07</b> | 13.00               | <b>1.87E-06</b> |
| <i>RBM12</i>  | 20  | 171.47              | <b>6.53E-11</b> | 184.61               | <b>2.97E-11</b> | 23.61               | <b>3.19E-11</b> |
| <i>NFS1</i>   | 20  | 19.12               | <b>2.37E-09</b> | 20.02                | <b>9.11E-10</b> | 19.12               | <b>2.36E-09</b> |
| <i>ST13</i>   | 22  | 12.90               | <b>1.57E-06</b> | 15.68                | <b>7.83E-08</b> | 13.22               | <b>1.12E-06</b> |
| <i>EP300</i>  | 22  | 11.67               | 4.22E-06        | 14.83                | <b>1.33E-07</b> | 11.95               | 3.11E-06        |

The test statistics of 44 tissues was combined using the Generalized Berk-Jones test to derive the test score. Chr: Chromosome.

**Table S11.** Result of single-tissue TWAS in arterial tissues for  $cIMT_{mean}$ 

| <b>Gene</b>     | <b>Chromosome</b> | <b><math>P_{artery\ aorta}</math></b> | <b><math>P_{artery\ coronary}</math></b> | <b><math>P_{artery\ tibial}</math></b> |
|-----------------|-------------------|---------------------------------------|------------------------------------------|----------------------------------------|
| <i>MRAS</i>     | 3                 | 1.7E-05                               | 1.0E-05                                  | <b>1.8E-06</b>                         |
| <i>FER</i>      | 5                 | <b>2.3E-06</b>                        | 1.3E-05                                  | 4.1E-05                                |
| <i>ERI1</i>     | 8                 | <b>2.7E-08</b>                        | <b>3.4E-08</b>                           | <b>1.2E-10</b>                         |
| <i>FAM167A</i>  | 8                 | <b>2.0E-06</b>                        | NA                                       | NA                                     |
| <i>FAM86B1</i>  | 8                 | 1.9E-05                               | <b>1.6E-07</b>                           | 1.5E-02                                |
| <i>FAM86B2</i>  | 8                 | 2.0E-04                               | <b>3.7E-08</b>                           | <b>3.2E-06</b>                         |
| <i>MSRA</i>     | 8                 | <b>4.1E-06</b>                        | <b>1.1E-08</b>                           | <b>6.0E-07</b>                         |
| <i>NEIL2</i>    | 8                 | 1.4E-05                               | 4.3E-04                                  | <b>8.4E-08</b>                         |
| <i>PINX1</i>    | 8                 | 1.9E-01                               | NA                                       | <b>3.5E-12</b>                         |
| <i>PPP1R3B</i>  | 8                 | NA                                    | NA                                       | <b>9.0E-07</b>                         |
| <i>SLC35G5</i>  | 8                 | <b>1.7E-11</b>                        | <b>5.0E-08</b>                           | <b>1.1E-09</b>                         |
| <i>SOX7</i>     | 8                 | 2.1E-05                               | 1.5E-03                                  | <b>1.4E-09</b>                         |
| <i>SVIL</i>     | 10                | <b>1.2E-06</b>                        | 9.8E-02                                  | 6.8E-05                                |
| <i>ARHGAP42</i> | 11                | <b>1.4E-07</b>                        | <b>3.7E-07</b>                           | <b>1.0E-07</b>                         |
| <i>TMEM133</i>  | 11                | <b>7.8E-08</b>                        | <b>8.1E-08</b>                           | <b>6.4E-08</b>                         |
| <i>LRP1</i>     | 12                | <b>7.1E-09</b>                        | <b>1.1E-08</b>                           | <b>1.6E-10</b>                         |
| <i>TLN2</i>     | 15                | <b>3.5E-08</b>                        | 2.5E-05                                  | <b>1.6E-06</b>                         |
| <i>BCAR1</i>    | 16                | <b>1.2E-12</b>                        | 1.0E-05                                  | <b>3.1E-12</b>                         |
| <i>CBFA2T3</i>  | 16                | <b>1.1E-08</b>                        | 1.8E-05                                  | 6.7E-01                                |
| <i>CDH13</i>    | 16                | <b>8.1E-12</b>                        | <b>1.7E-07</b>                           | <b>2.3E-12</b>                         |
| <i>CFDP1</i>    | 16                | 4.1E-01                               | <b>6.1E-12</b>                           | <b>3.4E-06</b>                         |
| <i>NDRG4</i>    | 16                | <b>2.4E-06</b>                        | NA                                       | <b>2.4E-06</b>                         |
| <i>ZNF469</i>   | 16                | 8.5E-01                               | 6.7E-01                                  | <b>3.1E-06</b>                         |
| <i>APOE</i>     | 19                | 6.3E-01                               | <b>1.9E-07</b>                           | 1.7E-04                                |
| <i>DMPK</i>     | 19                | <b>1.1E-06</b>                        | <b>9.7E-07</b>                           | <b>9.4E-07</b>                         |
| <i>DMWD</i>     | 19                | <b>3.1E-06</b>                        | <b>2.4E-06</b>                           | <b>1.9E-06</b>                         |
| <i>RBM12</i>    | 20                | 1.6E-01                               | <b>1.4E-09</b>                           | 6.1E-03                                |
| <i>ARVCF</i>    | 22                | <b>1.3E-06</b>                        | 7.6E-06                                  | 1.4E-05                                |
| <i>EP300</i>    | 22                | NA                                    | <b>5.6E-07</b>                           | 8.7E-06                                |
| <i>ST13</i>     | 22                | NA                                    | <b>1.6E-08</b>                           | 2.3E-01                                |

Marked in bold: significant associations passing respective Bonferroni corrected thresholds.

**Table S12.** Genes associated with cIMT via SMR analysis of the cIMTmean GWAS summary statistics and the eQTL summary statistics from GTEx.

| Probe ID               | Chr | Gene              | Top SNP    | A1 | A2 | Freq    | $P_{\text{GWAS}}$ | $P_{\text{eQTL}}$ | $P_{\text{SMR}}$ | $P_{\text{HEIDI}}$ |
|------------------------|-----|-------------------|------------|----|----|---------|-------------------|-------------------|------------------|--------------------|
| <b>Artery Aorta</b>    |     |                   |            |    |    |         |                   |                   |                  |                    |
| ENSG00000253893.2      | 8   | <i>FAM85B</i>     | rs2945886  | G  | C  | 0.44094 | 1.50E-08          | 1.17E-14          | 6.82E-06         | 6.18E-02           |
| ENSG00000197321.10     | 10  | <i>SVIL</i>       | rs10826719 | A  | G  | 0.58167 | 9.40E-10          | 2.56E-12          | 4.32E-06         | 4.41E-01           |
| ENSG00000165895.13     | 11  | <i>ARHGAP42</i>   | rs604723   | C  | T  | 0.71758 | 1.10E-07          | 7.32E-21          | 3.22E-06         | 1.56E-01           |
| ENSG00000170647.2      | 11  | <i>TMEM133</i>    | rs604723   | C  | T  | 0.71758 | 1.10E-07          | 4.25E-16          | 7.51E-06         | 2.08E-02           |
| ENSG00000171914.10     | 15  | <i>TLN2</i>       | rs956006   | T  | C  | 0.33367 | 1.10E-08          | 8.39E-19          | 2.49E-06         | 4.61E-01           |
| ENSG00000050820.12     | 16  | <i>BCAR1</i>      | rs4887824  | C  | T  | 0.58773 | 3.70E-13          | 3.00E-15          | 9.89E-08         | 6.98E-01           |
| ENSG00000140945.11     | 16  | <i>CDH13</i>      | rs7500448  | G  | A  | 0.25238 | 1.60E-08          | 1.10E-14          | 5.77E-06         | 7.66E-01           |
| <b>Artery Coronary</b> |     |                   |            |    |    |         |                   |                   |                  |                    |
| ENSG00000255310.2      | 8   | <i>AF131215.2</i> | rs6996846  | G  | C  | 0.53497 | 6.40E-11          | 1.09E-09          | 1.10E-05         | 1.74E-01           |
| ENSG00000170647.2      | 11  | <i>TMEM133</i>    | rs633185   | C  | G  | 0.71003 | 9.10E-08          | 1.58E-11          | 2.38E-05         | 9.10E-01           |
| <b>Artery Tibial</b>   |     |                   |            |    |    |         |                   |                   |                  |                    |
| ENSG00000253893.2      | 8   | <i>FAM85B</i>     | rs2955581  | C  | G  | 0.45954 | 1.00E-10          | 2.00E-20          | 1.37E-07         | 1.67E-01           |
| ENSG00000255310.2      | 8   | <i>AF131215.2</i> | rs2061830  | G  | C  | 0.48864 | 9.70E-12          | 8.48E-11          | 3.16E-06         | 6.16E-01           |
| ENSG00000079459.8      | 8   | <i>FDFT1</i>      | rs1736057  | A  | G  | 0.57633 | 4.30E-09          | 1.44E-37          | 1.76E-07         | 1.97E-01           |
| ENSG00000197321.10     | 10  | <i>SVIL</i>       | rs1571759  | C  | T  | 0.58211 | 7.40E-10          | 1.43E-19          | 3.80E-07         | 3.21E-01           |
| ENSG00000165895.13     | 11  | <i>ARHGAP42</i>   | rs604723   | C  | T  | 0.71758 | 1.10E-07          | 1.82E-30          | 1.17E-06         | 6.21E-01           |
| ENSG00000170647.2      | 11  | <i>TMEM133</i>    | rs604723   | C  | T  | 0.71758 | 1.10E-07          | 2.06E-34          | 8.91E-07         | 7.35E-01           |
| ENSG00000123384.9      | 12  | <i>LRP1</i>       | rs11172113 | C  | T  | 0.40633 | 2.60E-10          | 1.92E-17          | 3.43E-07         | 1.91E-01           |
| ENSG00000050820.12     | 16  | <i>BCAR1</i>      | rs3784935  | G  | T  | 0.59185 | 1.10E-11          | 2.06E-23          | 2.14E-08         | 1.80E-01           |

Chr: probe chromosome, A1: effect allele of the top SNP, A2: other allele; Freq: frequency of the A1 of the top SNP,  $P_{\text{GWAS}}$ : p-value from GWAS,  $P_{\text{eQTL}}$ : p-value from eQTL study,  $P_{\text{SMR}}$ : p-value from SMR analysis and  $P_{\text{HEIDI}}$ : p-value from HEIDI test. A total of 4705, 1975 and 6305 genes were tested in artery aorta, artery coronary and artery tibial tissues respectively. The corresponding significance levels ( $P_{\text{SMR}}$ ) after correcting for multiple testing for SMR analyses were  $1.06 \times 10^{-5}$ ,  $2.53 \times 10^{-5}$  and  $7.93 \times 10^{-6}$  respectively. The significance level for rejecting HEIDI test ( $P_{\text{HEIDI}}$ ) were  $0.05/8=0.00625$ ,  $0.05/3=0.0167$  and  $0.05/9=0.00556$  respectively; One gene RP11-252K23.2 on chromosome 16 was filtered out in all three tissues based on HEIDI test.

**Table S13.** Associations in MAGMA gene-based analysis.

| <b>Gene identifier</b> | <b>Gene symbol</b>    | <b>Chr</b> | <b>cIMT<sub>min</sub></b> | <b>cIMT<sub>mean</sub></b> | <b>cIMT<sub>max</sub></b> |
|------------------------|-----------------------|------------|---------------------------|----------------------------|---------------------------|
| ENSG00000152518        | <i>ZFP36L2</i>        | 2          | 1.06E-05                  | <b>1.91E-06</b>            | 4.85E-06                  |
| ENSG00000196460        | <i>RFX8</i>           | 2          | <b>1.74E-08</b>           | <b>1.89E-08</b>            | <b>1.19E-06</b>           |
| ENSG00000151617        | <i>EDNRA</i>          | 4          | <b>2.88E-07</b>           | <b>5.12E-08</b>            | <b>1.44E-06</b>           |
| ENSG00000152348        | <i>ATG10</i>          | 5          | <b>8.18E-07</b>           | <b>2.31E-06</b>            | 3.74E-05                  |
| ENSG00000186468        | <i>RPS23</i>          | 5          | <b>2.26E-07</b>           | <b>5.56E-07</b>            | 9.96E-06                  |
| ENSG00000205464        | <i>ATP6AP1L</i>       | 5          | <b>2.10E-11</b>           | <b>2.35E-11</b>            | <b>4.27E-09</b>           |
| ENSG00000113580        | <i>NR3C1</i>          | 5          | 3.37E-05                  | <b>2.38E-06</b>            | 1.84E-05                  |
| ENSG00000164463        | <i>CREBRF</i>         | 5          | <b>1.89E-06</b>           | <b>7.82E-08</b>            | <b>2.78E-07</b>           |
| ENSG00000113734        | <i>BNIP1</i>          | 5          | <b>1.65E-06</b>           | <b>8.21E-08</b>            | <b>5.56E-07</b>           |
| ENSG00000112699        | <i>GMDS</i>           | 6          | 2.74E-06                  | <b>1.08E-07</b>            | <b>6.97E-07</b>           |
| ENSG00000182611        | <i>HIST1H2AJ</i>      | 6          | 1.07E-05                  | <b>2.38E-06</b>            | 5.22E-05                  |
| ENSG00000184357        | <i>HIST1H1B</i>       | 6          | 7.18E-06                  | <b>1.42E-06</b>            | 7.15E-05                  |
| ENSG00000147316        | <i>MCPH1</i>          | 8          | <b>4.56E-10</b>           | <b>1.33E-07</b>            | <b>4.03E-08</b>           |
| ENSG00000147324        | <i>MFHAS1</i>         | 8          | <b>1.28E-14</b>           | <b>5.72E-14</b>            | <b>4.26E-12</b>           |
| ENSG00000104626        | <i>ER11</i>           | 8          | <b>1.71E-10</b>           | <b>3.71E-10</b>            | <b>1.01E-08</b>           |
| ENSG00000173281        | <i>PPP1R3B</i>        | 8          | <b>7.00E-08</b>           | <b>4.78E-07</b>            | 3.44E-05                  |
| ENSG00000173273        | <i>TNKS</i>           | 8          | <b>8.89E-07</b>           | <b>2.38E-06</b>            | 2.08E-05                  |
| ENSG00000175806        | <i>MSRA</i>           | 8          | <b>1.25E-11</b>           | <b>1.05E-11</b>            | <b>2.79E-10</b>           |
| ENSG00000183638        | <i>RP1L1</i>          | 8          | <b>8.68E-11</b>           | <b>3.93E-11</b>            | <b>1.25E-09</b>           |
| ENSG00000171056        | <i>SOX7</i>           | 8          | <b>7.60E-09</b>           | <b>1.89E-08</b>            | <b>4.54E-07</b>           |
| ENSG00000258724        | <i>SOX7</i>           | 8          | <b>5.30E-08</b>           | <b>1.16E-07</b>            | <b>1.90E-06</b>           |
| ENSG00000254093        | <i>PINX1</i>          | 8          | <b>3.42E-08</b>           | <b>8.71E-08</b>            | <b>1.57E-06</b>           |
| ENSG00000171044        | <i>XKR6</i>           | 8          | <b>3.09E-16</b>           | <b>6.39E-16</b>            | <b>2.30E-13</b>           |
| ENSG00000215346        | <i>AF131215.5</i>     | 8          | <b>1.28E-10</b>           | <b>3.24E-10</b>            | <b>8.28E-09</b>           |
| ENSG00000104643        | <i>MTMR9</i>          | 8          | <b>6.46E-10</b>           | <b>2.22E-10</b>            | <b>3.11E-09</b>           |
| ENSG00000177710        | <i>SLC35G5</i>        | 8          | <b>4.60E-07</b>           | <b>3.01E-07</b>            | <b>2.51E-06</b>           |
| ENSG00000184608        | <i>C8orf12</i>        | 8          | <b>5.24E-11</b>           | <b>4.55E-11</b>            | <b>5.00E-10</b>           |
| ENSG00000154319        | <i>FAM167A</i>        | 8          | <b>3.78E-09</b>           | <b>4.24E-09</b>            | <b>5.48E-08</b>           |
| ENSG00000136573        | <i>BLK</i>            | 8          | <b>8.20E-12</b>           | <b>6.43E-12</b>            | <b>8.71E-11</b>           |
| ENSG00000136574        | <i>GATA4</i>          | 8          | <b>2.89E-11</b>           | <b>8.39E-11</b>            | <b>2.49E-09</b>           |
| ENSG00000255046        | <i>RP11-297N6.4</i>   | 8          | <b>1.62E-06</b>           | <b>1.94E-06</b>            | 3.44E-05                  |
| ENSG00000205882        | <i>DEFB134</i>        | 8          | <b>3.79E-07</b>           | <b>9.71E-07</b>            | 1.82E-05                  |
| ENSG00000255098        | <i>RP11-481A20.11</i> | 8          | <b>2.55E-06</b>           | <b>2.57E-06</b>            | 1.13E-05                  |
| ENSG00000157657        | <i>ZNF618</i>         | 9          | <b>1.06E-06</b>           | 4.74E-05                   | 1.37E-03                  |
| ENSG00000169126        | <i>ARMC4</i>          | 10         | 7.85E-05                  | <b>1.44E-06</b>            | <b>1.45E-07</b>           |
| ENSG00000135517        | <i>MIP</i>            | 12         | <b>5.15E-07</b>           | <b>6.54E-07</b>            | 6.46E-06                  |
| ENSG00000176422        | <i>SPRYD4</i>         | 12         | 3.43E-06                  | <b>2.06E-06</b>            | 1.91E-05                  |
| ENSG00000135423        | <i>GLS2</i>           | 12         | <b>2.30E-06</b>           | <b>9.08E-07</b>            | <b>2.41E-06</b>           |
| ENSG00000198774        | <i>RASSF9</i>         | 12         | 6.06E-06                  | <b>1.26E-07</b>            | <b>1.36E-07</b>           |
| ENSG00000134871        | <i>COL4A2</i>         | 13         | <b>1.74E-07</b>           | <b>4.11E-07</b>            | 2.88E-06                  |
| ENSG00000171914        | <i>TLN2</i>           | 15         | 3.74E-05                  | <b>1.73E-06</b>            | 4.42E-06                  |
| ENSG00000166949        | <i>SMAD3</i>          | 15         | <b>2.32E-06</b>           | 9.25E-06                   | 3.88E-04                  |
| ENSG00000129038        | <i>LOXL1</i>          | 15         | <b>1.06E-06</b>           | <b>1.66E-06</b>            | <b>1.65E-06</b>           |
| ENSG00000125107        | <i>CNOT1</i>          | 16         | 4.74E-06                  | <b>5.14E-07</b>            | <b>1.75E-06</b>           |
| ENSG00000153774        | <i>CFDP1</i>          | 16         | <b>3.58E-12</b>           | <b>2.37E-12</b>            | <b>1.45E-10</b>           |
| ENSG00000261717        | <i>RP11-77K12.1</i>   | 16         | <b>2.65E-11</b>           | <b>7.80E-12</b>            | <b>6.22E-10</b>           |
| ENSG00000166822        | <i>TMEM170A</i>       | 16         | <b>4.40E-10</b>           | <b>1.05E-10</b>            | <b>5.80E-09</b>           |
| ENSG00000183196        | <i>CHST6</i>          | 16         | 1.02E-05                  | <b>1.38E-06</b>            | 7.63E-06                  |
| ENSG00000103335        | <i>PIEZO1</i>         | 16         | <b>3.66E-07</b>           | <b>1.69E-06</b>            | 8.11E-06                  |
| ENSG00000129993        | <i>CBFA2T3</i>        | 16         | <b>3.53E-12</b>           | <b>1.44E-11</b>            | <b>2.37E-10</b>           |
| ENSG00000205018        | <i>RP11-830F9.6</i>   | 16         | <b>1.46E-13</b>           | <b>5.17E-13</b>            | <b>4.44E-12</b>           |

| <b>Gene identifier</b> | <b>Gene symbol</b> | <b>Chr</b> | <b>cIMT<sub>min</sub></b> | <b>cIMT<sub>mean</sub></b> | <b>cIMT<sub>max</sub></b> |
|------------------------|--------------------|------------|---------------------------|----------------------------|---------------------------|
| ENSG00000130203        | <i>APOE</i>        | 19         | <b>3.33E-16</b>           | <b>7.55E-11</b>            | <b>2.22E-16</b>           |
| ENSG00000130208        | <i>APOC1</i>       | 19         | <b>4.96E-07</b>           | <b>1.40E-07</b>            | <b>6.87E-08</b>           |
| ENSG00000078804        | <i>TP53INP2</i>    | 20         | <b>1.10E-06</b>           | <b>1.74E-06</b>            | 9.36E-06                  |
| ENSG00000088298        | <i>EDEM2</i>       | 20         | <b>3.37E-07</b>           | <b>1.50E-06</b>            | 1.16E-05                  |
| ENSG00000124126        | <i>PREX1</i>       | 20         | 1.78E-05                  | <b>4.13E-07</b>            | <b>1.85E-06</b>           |

Chr: Chromosome. Marked in bold: significant association with  $P < 2.63 \times 10^{-6}$ .

**Table S14.** Top ten genes prioritized by DEPICT to be associated with cIMT

| Locus                           | Nr of genes in locus | Chromosome and position   | Ensembl Gene ID | Gene symbol        | Nominal P value | Gene closest to lead SNP | Gene bio-type                                                                 | Top cis eQTL SNP (Westra et al. Nature Genetics 2014) | False discovery rate < 5% |
|---------------------------------|----------------------|---------------------------|-----------------|--------------------|-----------------|--------------------------|-------------------------------------------------------------------------------|-------------------------------------------------------|---------------------------|
| <b>cIMT<sub>min</sub></b>       |                      |                           |                 |                    |                 |                          |                                                                               |                                                       |                           |
| rs12549144;rs13262031;rs7831557 | 29                   | chr8:9106927-11726957     | ENSG00000136574 | <i>GATA4</i>       | 5.10E-06        | FALSE                    | protein coding+ processed transcript+ retained intron                         | -                                                     | Yes                       |
| rs342988                        | 1                    | chr7:35242042-35293758    | ENSG00000164532 | <i>TBX20</i>       | 7.09E-03        | TRUE                     | protein coding+ retained intron                                               | rs1833130;rs17676885                                  | No                        |
| rs914279                        | 1                    | chr10:30301729-30404423   | ENSG00000165757 | <i>JCAD</i>        | 7.19E-03        | TRUE                     | protein coding+ processed transcript                                          | -                                                     | No                        |
| rs12549144;rs13262031;rs7831557 | 29                   | chr8:9106927-11726957     | ENSG00000171056 | <i>SOX7</i>        | 8.02E-03        | FALSE                    | protein coding                                                                | rs10092781;rs7001281                                  | No                        |
| rs12549144;rs13262031;rs7831557 | 29                   | chr8:9106927-11726957     | ENSG00000255394 | <i>C8orf49</i>     | 2.98E-02        | FALSE                    | protein coding                                                                | -                                                     | No                        |
| rs9515203                       | 1                    | chr13:110958159-111165374 | ENSG00000134871 | <i>COL4A2</i>      | 9.68E-02        | TRUE                     | protein coding+ processed transcript                                          | -                                                     | No                        |
| rs12549144;rs13262031;rs7831557 | 29                   | chr8:9106927-11726957     | ENSG00000184608 | <i>C8orf12</i>     | 1.06E-01        | FALSE                    | processed transcript+ protein coding                                          | -                                                     | No                        |
| rs12549144;rs13262031;rs7831557 | 29                   | chr8:9106927-11726957     | ENSG00000173273 | <i>TNKS</i>        | 1.07E-01        | TRUE                     | protein coding+ processed transcript+ retained intron+nonsense mediated decay | rs17737611                                            | No                        |
| rs2019090                       | 1                    | chr11:103777914-104035107 | ENSG00000170962 | <i>PDGFD</i>       | 1.10E-01        | TRUE                     | protein coding                                                                | rs481552;rs11226008                                   | No                        |
| rs12549144;rs13262031;rs7831557 | 29                   | chr8:9106927-11726957     | ENSG00000253887 | -                  | 1.20E-01        | FALSE                    | lincRNA                                                                       | -                                                     | No                        |
| <b>cIMT<sub>mean</sub></b>      |                      |                           |                 |                    |                 |                          |                                                                               |                                                       |                           |
| rs342988                        | 1                    | chr7:35242042-35293758    | ENSG00000164532 | <i>TBX20</i>       | 1.10E-02        | TRUE                     | protein coding+ retained intron                                               | rs1833130;rs17676885                                  | No                        |
| rs914279                        | 1                    | chr10:30301729-30404423   | ENSG00000165757 | <i>JCAD</i>        | 4.92E-02        | TRUE                     | protein coding+ processed transcript                                          | -                                                     | No                        |
| rs9329221                       | 17                   | chr8:9911778-11296167     | ENSG00000171056 | <i>SOX7</i>        | 5.16E-02        | FALSE                    | protein coding                                                                | rs10092781;rs7001281                                  | No                        |
| rs224960                        | 1                    | chr5:81575281-81682796    | ENSG00000205464 | <i>ATP6AP1L</i>    | 6.75E-02        | TRUE                     | protein coding+ processed transcript+ retained intron                         | -                                                     | No                        |
| rs4774437                       | 1                    | chr15:62682725-63136830   | ENSG00000171914 | <i>TLN2</i>        | 1.25E-01        | TRUE                     | processed transcript+ protein coding+ retained intron                         | -                                                     | No                        |
| rs6795735                       | 1                    | chr3:64670585-64997143    | ENSG00000241684 | <i>ADAMTS9-AS2</i> | 1.37E-01        | TRUE                     | processed transcript+ retained intron                                         | -                                                     | No                        |
| rs7500448                       | 1                    | chr16:82660663-83829174   | ENSG00000140945 | <i>CDH13</i>       | 1.54E-01        | TRUE                     | protein coding                                                                | rs16962255;rs6565105                                  | No                        |
| rs9329221                       | 17                   | chr8:9911778-11296167     | ENSG00000255310 | -                  | 1.79E-01        | FALSE                    | protein coding                                                                | -                                                     | No                        |
| rs9329221                       | 17                   | chr8:9911778-11296167     | ENSG00000184608 | <i>C8orf12</i>     | 2.25E-01        | FALSE                    | processed transcript+protein coding                                           | -                                                     | No                        |
| rs9515203                       | 1                    | chr13:110958159-111165374 | ENSG00000134871 | <i>COL4A2</i>      | 2.52E-01        | TRUE                     | protein coding+processed transcript                                           | -                                                     | No                        |



**Table S15.** Gene prioritization results for GWAS loci identified in the UK Biobank

| Gene            | Chr | Region | SNP-level analysis          |                                |                                                   | Gene-level analysis |               |              |        |
|-----------------|-----|--------|-----------------------------|--------------------------------|---------------------------------------------------|---------------------|---------------|--------------|--------|
|                 |     |        | Closest to the lead variant | Closest to fine-mapped variant | Coding variant in high LD to fine-mapped variant* | Cross-tissue TWAS†  | Arterial TWAS | SMR analysis | DEPICT |
| <i>EML4</i>     | 2   | p21    |                             | y                              | y                                                 |                     |               |              |        |
| <i>COX7A2L</i>  | 2   | p21    | main                        |                                |                                                   |                     |               |              |        |
| <i>KCNG3</i>    | 2   | p21    | main                        |                                |                                                   |                     |               |              |        |
| <i>ZFP36L2</i>  | 2   | p21    |                             |                                |                                                   |                     |               |              |        |
| <i>RFX8</i>     | 2   | q11.2  | main                        | y                              | y                                                 |                     |               |              |        |
| <i>FN1</i>      | 2   | q35    | main                        | y                              |                                                   |                     |               |              |        |
| <i>ZNF385D</i>  | 3   | p24.3  | main                        | y                              |                                                   |                     |               |              |        |
| <i>ADAMTS9</i>  | 3   | p14.1  | main                        | y                              |                                                   |                     |               |              |        |
| <i>EDNRA</i>    | 4   | q31.22 | main                        | y                              |                                                   |                     |               |              |        |
| <i>HAND2</i>    | 4   | q34.1  | main                        | y                              |                                                   |                     |               |              |        |
| <i>RPS23</i>    | 5   | q14.2  |                             |                                |                                                   |                     |               |              |        |
| <i>ATP6AP1L</i> | 5   | q14.2  | main                        | y                              |                                                   |                     |               |              |        |
| <i>XRCC4</i>    | 5   | q14.2  |                             |                                |                                                   | y                   |               |              |        |
| <i>VCAN</i>     | 5   | q14.2  | main                        | y                              |                                                   |                     |               |              |        |
| <i>HAPLN1</i>   | 5   | q14.2  | sex interaction (female)    | y                              |                                                   |                     |               |              |        |
| <i>ARHGAP26</i> | 5   | q31.3  |                             | y                              |                                                   |                     |               |              |        |
| <i>NR3C1</i>    | 5   | q31.3  | main                        | y                              | y                                                 |                     |               |              |        |
| <i>GMDS</i>     | 6   | p25.3  | main                        | y                              |                                                   |                     |               |              |        |
| <i>TBX20</i>    | 7   | p14.2  | main                        | y                              |                                                   |                     |               |              |        |
| <i>HERPUD2</i>  | 7   | p14.2  | male                        |                                |                                                   |                     |               |              |        |
| <i>MCPH1</i>    | 8   | p23.1  | main                        | y                              |                                                   |                     |               |              |        |
| <i>FAM85B</i>   | 8   | p23.1  |                             |                                |                                                   |                     |               | y            |        |
| <i>ZNF705B</i>  | 8   | p23.1  | main                        | y                              |                                                   |                     |               |              |        |
| <i>MFHAS1</i>   | 8   | p23.1  |                             |                                |                                                   | y                   |               |              |        |
| <i>ERI1</i>     | 8   | p23.1  |                             |                                |                                                   | y                   | y             |              |        |
| <i>PPP1R3B</i>  | 8   | p23.1  |                             |                                |                                                   | y                   | y             |              |        |
| <i>TNKS</i>     | 8   | p23.1  |                             |                                |                                                   | y                   |               |              |        |
| <i>MSRA</i>     | 8   | p23.1  |                             |                                |                                                   | y                   | y             |              |        |
| <i>RP1L1</i>    | 8   | p23.1  |                             |                                |                                                   |                     |               |              |        |
| <i>SOX7</i>     | 8   | p23.1  | sex interaction (male)      |                                |                                                   | y                   | y             |              |        |
| <i>PINX1</i>    | 8   | p23.1  |                             |                                |                                                   | y                   | y             |              |        |



|              |    |        |                        |   |   |   |   |   |   |
|--------------|----|--------|------------------------|---|---|---|---|---|---|
| XKR6         | 8  | p23.1  | main                   | y |   | y |   |   |   |
| AF131215.5   | 8  | p23.1  |                        |   |   |   |   | y |   |
| MTMR9        | 8  | p23.1  |                        |   |   | y |   |   |   |
| SLC35G5      | 8  | p23.1  |                        |   |   | y | y |   |   |
| C8orf12      | 8  | p23.1  |                        |   |   | y |   |   |   |
| FAM167A      | 8  | p23.1  |                        |   |   | y | y |   |   |
| BLK          | 8  | p23.1  |                        |   |   | y |   |   |   |
| GATA4        | 8  | p23.1  | sex interaction (male) |   |   | y |   |   | y |
| C8orf49      | 8  | p23.1  | sex interaction (male) |   |   | y |   |   |   |
| NEIL2        | 8  | p23.1  |                        |   |   | y | y |   |   |
| FDFT1        | 8  | p23.1  |                        |   |   |   |   | y |   |
| DEFB134      | 8  | p23.1  |                        |   |   | y |   |   |   |
| FAM86B1      | 8  | p23.1  |                        |   |   | y | y |   |   |
| FAM86B2      | 8  | p23.1  |                        |   |   | y | y |   |   |
| ZBTB10       | 8  | q21.13 | main                   | y |   |   |   |   |   |
| ZHX2         | 8  | q24.13 | main                   | y |   |   |   |   |   |
| FBXO32       | 8  | q24.13 | main                   | y |   |   |   |   |   |
| ZNF618       | 9  | q32    | main                   | y | y |   |   |   |   |
| ARMC4        | 10 | p12.1  | main                   | y | y |   |   |   |   |
| SVIL         | 10 | p11.23 | main                   |   |   |   | y | y |   |
| JCAD         | 10 | p11.23 | main                   | y | y |   |   |   |   |
| PDGFD        | 11 | q22.3  | main                   | y |   | y |   |   |   |
| GLS2         | 12 | q13.3  |                        |   |   |   |   |   |   |
| STAT6        | 12 | q13.3  | main                   |   |   |   |   |   |   |
| LRP1         | 12 | q13.3  | main                   | y |   | y | y |   |   |
| R3HDM2       | 12 | q13.3  |                        | y |   |   |   |   |   |
| INHBC        | 12 | q13.3  |                        |   | y |   |   |   |   |
| RASSF9       | 12 | q21.31 | main                   | y |   |   |   |   |   |
| COL4A1       | 13 | q34    |                        | y |   |   |   |   |   |
| COL4A2       | 13 | q34    | main                   | y |   |   |   |   |   |
| SYNE3        | 14 | q32.13 | sex interaction (male) |   |   |   |   |   |   |
| FBN1         | 15 | q21.1  | main                   | y |   |   |   |   |   |
| TLN2         | 15 | q22.2  | main                   | y |   | y | y | y |   |
| LOXL1        | 15 | q24.1  | meta-analysis          | y |   |   |   |   |   |
| RFWD3        | 16 | q23.1  |                        |   |   | y |   |   |   |
| LDHD         | 16 | q23.1  |                        |   |   | y |   |   |   |
| BCAR1        | 16 | q23.1  |                        | y |   | y | y | y |   |
| CFDP1        | 16 | q23.1  | main                   | y |   |   |   |   |   |
| RP11-77K12.1 | 16 | q23.1  |                        |   |   |   |   |   |   |

|                     |    |        |                             |  |   |  |   |  |   |   |   |
|---------------------|----|--------|-----------------------------|--|---|--|---|--|---|---|---|
| <i>TMEM170A</i>     | 16 | q23.1  |                             |  |   |  |   |  | y |   |   |
| <i>CDH13</i>        | 16 | q23.3  | main                        |  | y |  |   |  |   | y | y |
| <i>MVD</i>          | 16 | q24.2  |                             |  |   |  |   |  | y |   |   |
| <i>ZNF469</i>       | 16 | q24.2  |                             |  |   |  |   |  |   | y |   |
| <i>CBFA2T3</i>      | 16 | q24.3  | main                        |  | y |  |   |  |   | y |   |
| <i>RP11-830F9.6</i> | 16 | q24.3  |                             |  |   |  |   |  |   |   |   |
| <i>MAP2K4</i>       | 17 | p12    | sex interaction<br>(female) |  | y |  |   |  |   |   |   |
| <i>MYOCD</i>        | 17 | p12    | main                        |  | y |  |   |  |   |   |   |
| <i>SHKBP1</i>       | 19 | q13.2  | main                        |  |   |  |   |  |   |   |   |
| <i>LTBP4</i>        | 19 | q13.2  | main                        |  | y |  |   |  |   |   |   |
| <i>CYP2A6</i>       | 19 | q13.2  | main                        |  |   |  |   |  |   |   |   |
| <i>PVRL2</i>        | 19 | q13.32 |                             |  |   |  |   |  | y |   |   |
| <i>TOMM40</i>       | 19 | q13.32 | main                        |  |   |  |   |  |   |   |   |
| <i>APOE</i>         | 19 | q13.32 | main                        |  | y |  | y |  |   | y |   |
| <i>APOC1</i>        | 19 | q13.32 | main                        |  | y |  |   |  |   |   |   |
| <i>ZNF296</i>       | 19 | q13.32 |                             |  |   |  |   |  | y |   |   |
| <i>DMPK</i>         | 19 | q13.32 |                             |  |   |  |   |  |   | y |   |
| <i>DMWD</i>         | 19 | q13.32 |                             |  |   |  |   |  |   | y |   |
| <i>ZNF341</i>       | 20 | q11.22 |                             |  |   |  |   |  | y |   |   |
| <i>ITCH</i>         | 20 | q11.22 | main                        |  |   |  |   |  | y |   |   |
| <i>EDEM2</i>        | 20 | q11.22 | main                        |  |   |  |   |  |   |   |   |
| <i>MMP24</i>        | 20 | q11.22 | main                        |  | y |  |   |  | y |   |   |
| <i>FAM83C</i>       | 20 | q11.22 |                             |  |   |  |   |  | y |   |   |
| <i>GDF5OS</i>       | 20 | q11.22 |                             |  |   |  |   |  | y |   |   |
| <i>GDF5</i>         | 20 | q11.22 |                             |  |   |  |   |  | y |   |   |
| <i>RBM12</i>        | 20 | q11.22 |                             |  |   |  |   |  | y |   | y |
| <i>NFS1</i>         | 20 | q11.22 |                             |  |   |  |   |  | y |   |   |
| <i>MRTFA</i>        | 22 | q13.2  | main                        |  |   |  |   |  |   |   |   |
| <i>ST13</i>         | 22 | q13.2  |                             |  |   |  |   |  | y |   | y |
| <i>EP300</i>        | 22 | q13.2  |                             |  |   |  |   |  | y |   | y |

Genes located within loci identified in the UK Biobank via the main GWAS, sex interaction analysis and meta-analysis were included; Rows with alternate colors indicate different loci. Genes closest to the lead variant included the nearest gene and any additional gene within 10 KB of the lead variant. Chr: Chromosome; \*: if there existed non-synonymous variant in LD  $R^2 > 0.8$  with the fine-mapped variant; †: genes consistently prioritized in all cIMT traits were noted.

**Table S16** Top ten results from MAGMA gene-set analyses for three cIMT phenotypes

| Gene Set                                                                              | $N_{\text{genes}}$ | Beta  | Beta STD | SE    | $P$      | $P_{\text{bon}}$ |
|---------------------------------------------------------------------------------------|--------------------|-------|----------|-------|----------|------------------|
| <b>cIMT<sub>min</sub></b>                                                             |                    |       |          |       |          |                  |
| Curated gene sets:reactome crosslinking of collagen fibrils                           | 16                 | 1.337 | 0.039    | 0.258 | 1.15E-07 | <b>0.002</b>     |
| Curated gene sets:nikolsky breast cancer 20q11 amplicon                               | 31                 | 1.426 | 0.057    | 0.284 | 2.66E-07 | <b>0.004</b>     |
| Curated gene sets:reactome signaling by pdgf                                          | 58                 | 0.583 | 0.032    | 0.127 | 2.18E-06 | <b>0.034</b>     |
| GO cc:go collagen type iv trimer                                                      | 4                  | 2.414 | 0.035    | 0.535 | 3.18E-06 | <b>0.049</b>     |
| GO bp:go peptidyl lysine oxidation                                                    | 5                  | 1.984 | 0.032    | 0.457 | 7.26E-06 | 0.112            |
| GO mf:go protein lysine 6 oxidase activity                                            | 5                  | 1.984 | 0.032    | 0.457 | 7.26E-06 | 0.112            |
| GO cc:go cell substrate junction                                                      | 395                | 0.196 | 0.028    | 0.045 | 7.65E-06 | 0.118            |
| Curated gene sets:ji carcinogenesis by kras and stk11 dn                              | 16                 | 1.017 | 0.029    | 0.235 | 7.81E-06 | 0.121            |
| GO bp:go regulation of platelet derived growth factor receptor beta signaling pathway | 8                  | 1.350 | 0.027    | 0.314 | 8.49E-06 | 0.131            |
| GO bp:go platelet derived growth factor receptor beta signaling pathway               | 14                 | 1.068 | 0.029    | 0.253 | 1.22E-05 | 0.188            |
| <b>cIMT<sub>mean</sub></b>                                                            |                    |       |          |       |          |                  |
| Curated gene sets:nikolsky breast cancer 20q11 amplicon                               | 31                 | 1.424 | 0.057    | 0.284 | 2.68E-07 | <b>0.004</b>     |
| Curated gene sets:reactome crosslinking of collagen fibrils                           | 16                 | 1.279 | 0.037    | 0.258 | 3.65E-07 | <b>0.006</b>     |
| Curated gene sets:reactome signaling by pdgf                                          | 58                 | 0.620 | 0.034    | 0.127 | 4.95E-07 | <b>0.008</b>     |
| Curated gene sets:nakamura adipogenesis late dn                                       | 35                 | 0.697 | 0.030    | 0.160 | 6.70E-06 | 0.104            |
| GO bp:go artery development                                                           | 84                 | 0.464 | 0.031    | 0.108 | 9.34E-06 | 0.145            |
| GO bp:go regulation of low density lipoprotein particle receptor catabolic process    | 5                  | 1.802 | 0.029    | 0.422 | 9.68E-06 | 0.150            |
| Curated gene sets:reactome chylomicron clearance                                      | 5                  | 1.888 | 0.030    | 0.447 | 1.20E-05 | 0.185            |
| Curated gene sets:tsai response to radiation therapy                                  | 33                 | 0.732 | 0.030    | 0.173 | 1.20E-05 | 0.185            |
| GO bp:go ameboidal type cell migration                                                | 368                | 0.201 | 0.027    | 0.048 | 1.64E-05 | 0.253            |
| GO bp:go low density lipoprotein particle remodeling                                  | 14                 | 1.069 | 0.029    | 0.258 | 1.76E-05 | 0.273            |
| <b>cIMT<sub>max</sub></b>                                                             |                    |       |          |       |          |                  |
| Curated gene sets:nikolsky breast cancer 20q11 amplicon                               | 31                 | 1.362 | 0.055    | 0.280 | 5.64E-07 | <b>0.009</b>     |
| Curated gene sets:reactome crosslinking of collagen fibrils                           | 16                 | 1.216 | 0.035    | 0.254 | 8.85E-07 | <b>0.014</b>     |
| Curated gene sets:reactome signaling by pdgf                                          | 58                 | 0.559 | 0.031    | 0.125 | 3.68E-06 | 0.057            |
| GO bp:go artery development                                                           | 84                 | 0.478 | 0.031    | 0.107 | 3.80E-06 | 0.059            |
| Curated gene sets:reactome chylomicron clearance                                      | 5                  | 1.959 | 0.032    | 0.440 | 4.31E-06 | 0.067            |
| GO bp:go regulation of low density lipoprotein particle receptor catabolic process    | 5                  | 1.795 | 0.029    | 0.416 | 7.90E-06 | 0.122            |
| GO bp:go low density lipoprotein particle remodeling                                  | 14                 | 1.096 | 0.030    | 0.254 | 8.27E-06 | 0.128            |
| GO bp:go dephosphorylation                                                            | 451                | 0.171 | 0.026    | 0.041 | 1.55E-05 | 0.240            |
| GO bp:go protein containing complex remodeling                                        | 30                 | 0.717 | 0.028    | 0.174 | 1.99E-05 | 0.307            |
| Curated gene sets:hellebrekers silenced during tumor angiogenesis                     | 75                 | 0.444 | 0.028    | 0.108 | 2.02E-05 | 0.312            |

$P_{\text{bon}}$  : Bonferroni corrected P-value.

**Table S17.** cIMT variants significantly associated with CAD

| cIMT lead SNP | CAD meta-analysis SNP | Chr | Position  | Effect  | SE     | <i>P</i>        | Gene                    |
|---------------|-----------------------|-----|-----------|---------|--------|-----------------|-------------------------|
| rs515135      | rs515135              | 2   | 21286057  | -0.0555 | 0.0066 | <b>5.74E-17</b> | <i>APOB</i>             |
| rs6795735     | rs7428936             | 3   | 64710850  | -0.019  | 0.0052 | <b>2.87E-04</b> | <i>ADAMTS9</i>          |
| rs59415853    | rs6841581             | 4   | 148401190 | 0.0751  | 0.0074 | <b>5.18E-24</b> | <i>EDNRA</i>            |
| rs17477177    | rs12705390            | 7   | 106410777 | 0.03    | 0.0062 | <b>1.21E-06</b> | <i>PIK3CG</i>           |
| rs7004066     | rs6995692             | 8   | 10587008  | -0.0189 | 0.0058 | <b>1.18E-03</b> | <i>SOX7</i>             |
| rs55917128    | rs11189523            | 10  | 100011077 | -0.0268 | 0.0056 | <b>1.96E-06</b> | <i>LOXL4</i>            |
| rs974819      | rs974819              | 11  | 103660567 | 0.0614  | 0.0055 | <b>1.12E-28</b> | <i>PDGFD</i>            |
| rs11172113    | rs11172113            | 12  | 57527283  | -0.0227 | 0.0051 | <b>1.04E-05</b> | <i>STAT6,LRP1</i>       |
| rs9515203     | rs9515203             | 13  | 111049623 | 0.0596  | 0.006  | <b>3.89E-23</b> | <i>COL4A2</i>           |
| rs12441130    | rs12441130            | 15  | 74234902  | 0.0199  | 0.0056 | <b>4.13E-04</b> | <i>LOXL1</i>            |
| rs3851740     | rs8046696             | 16  | 75442143  | -0.0479 | 0.0058 | <b>1.91E-16</b> | <i>BCAR/CFDP151</i>     |
| rs7500448     | rs7500448             | 16  | 83045790  | 0.0557  | 0.0068 | <b>1.61E-16</b> | <i>CDH13</i>            |
| rs7412        | rs7412                | 19  | 45412079  | -0.1368 | 0.011  | <b>2.14E-35</b> | <i>APOE,APOC,TOMM40</i> |
| rs8139974     | rs139064              | 22  | 40886557  | 0.0215  | 0.0057 | <b>1.56E-04</b> | <i>MRTFA</i>            |

Chr: Chromosome; SE: standard error. Marked in bold: significant association after Bonferroni correction with  $P < 1.19 \times 10^{-3}$  (0.05/42).

Associations of CAD were obtained in a meta-analysis of UK Biobank and CARDIoGRAMplusC4D. If a cIMT lead SNP was not available in the meta-analysis, a proxy SNP in high LD ( $R^2 > 0.8$ ) was selected.

## Supplementary figures

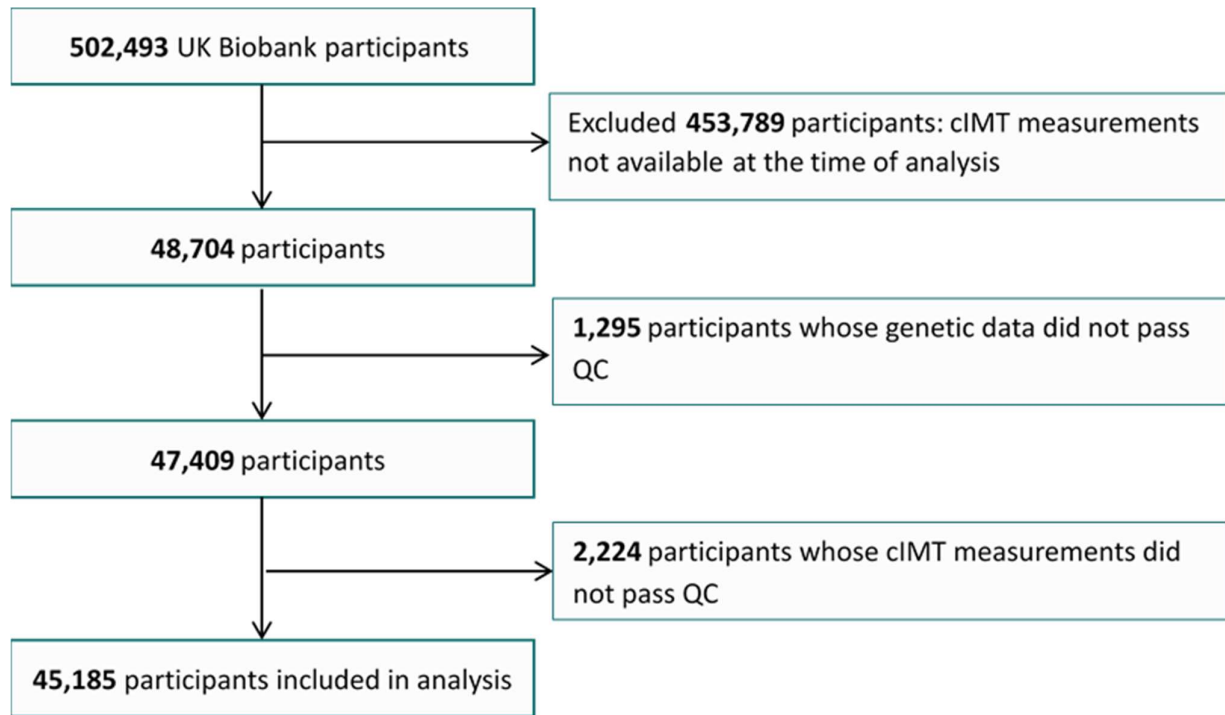

**Figure S1.** Study population.

GWAS on cIMT measurements were performed in 45,185 participants in the UK Biobank.

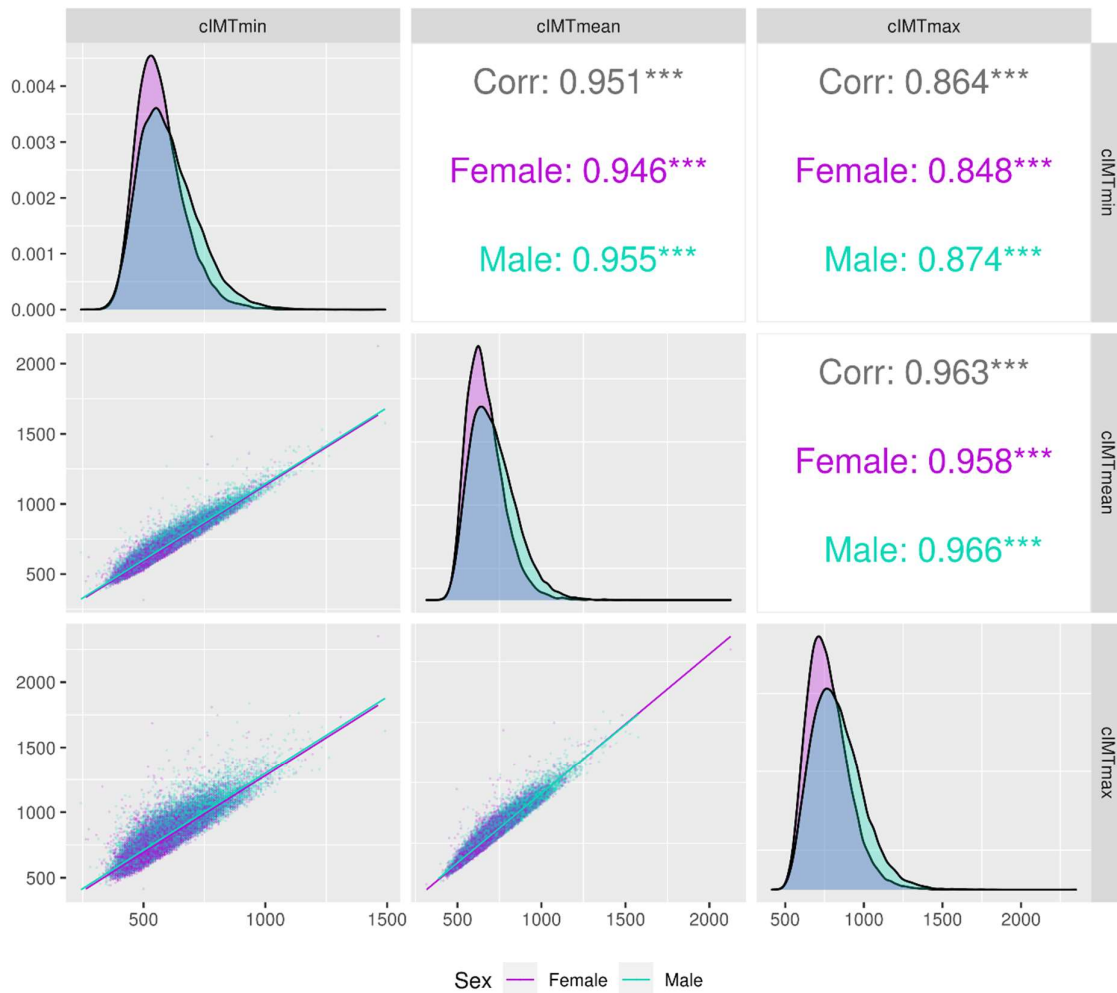

**Figure S2.** Distribution and correlations Between cIMT measurements. Diagonal: Distribution of cIMT<sub>min</sub>, cIMT<sub>mean</sub>, cIMT<sub>max</sub> stratified by sex; lower triangular panels: scatterplots against cIMT measurements; upper triangular panels: Spearman rank correlations between cIMT measurements in overall sample (Corr) and sex-stratified.

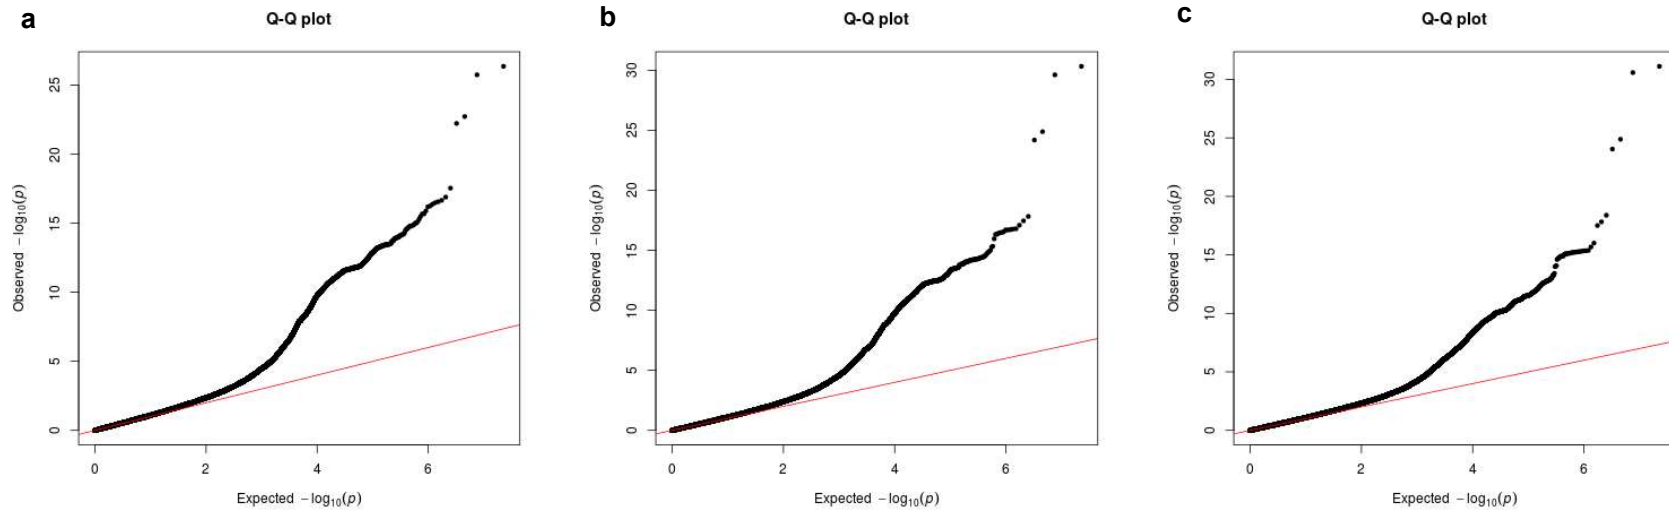

**Figure S3.** Q-Q plot for the three cIMT measurements

a: cIMT<sub>min</sub>; b: cIMT<sub>mean</sub>; c: cIMT<sub>max</sub>. The genomic inflation factor  $\lambda$  are 1.06, 1.07 and 1.07 for cIMT<sub>min</sub>, cIMT<sub>mean</sub> and cIMT<sub>max</sub> respectively





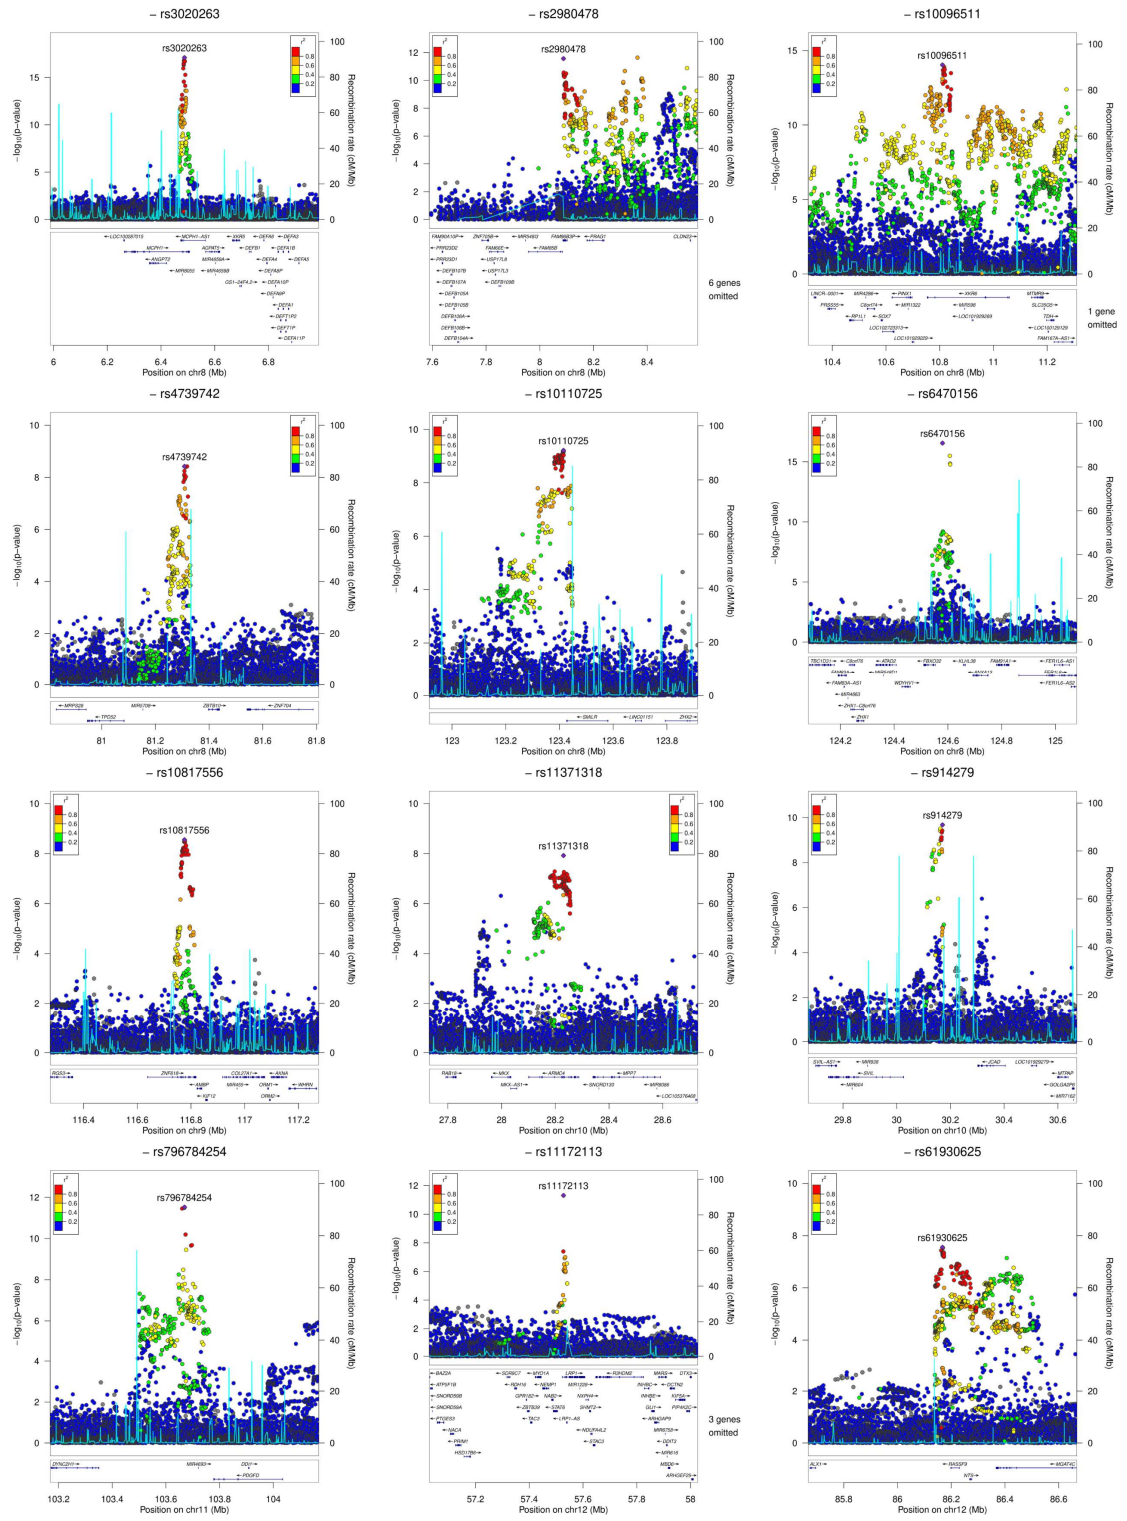

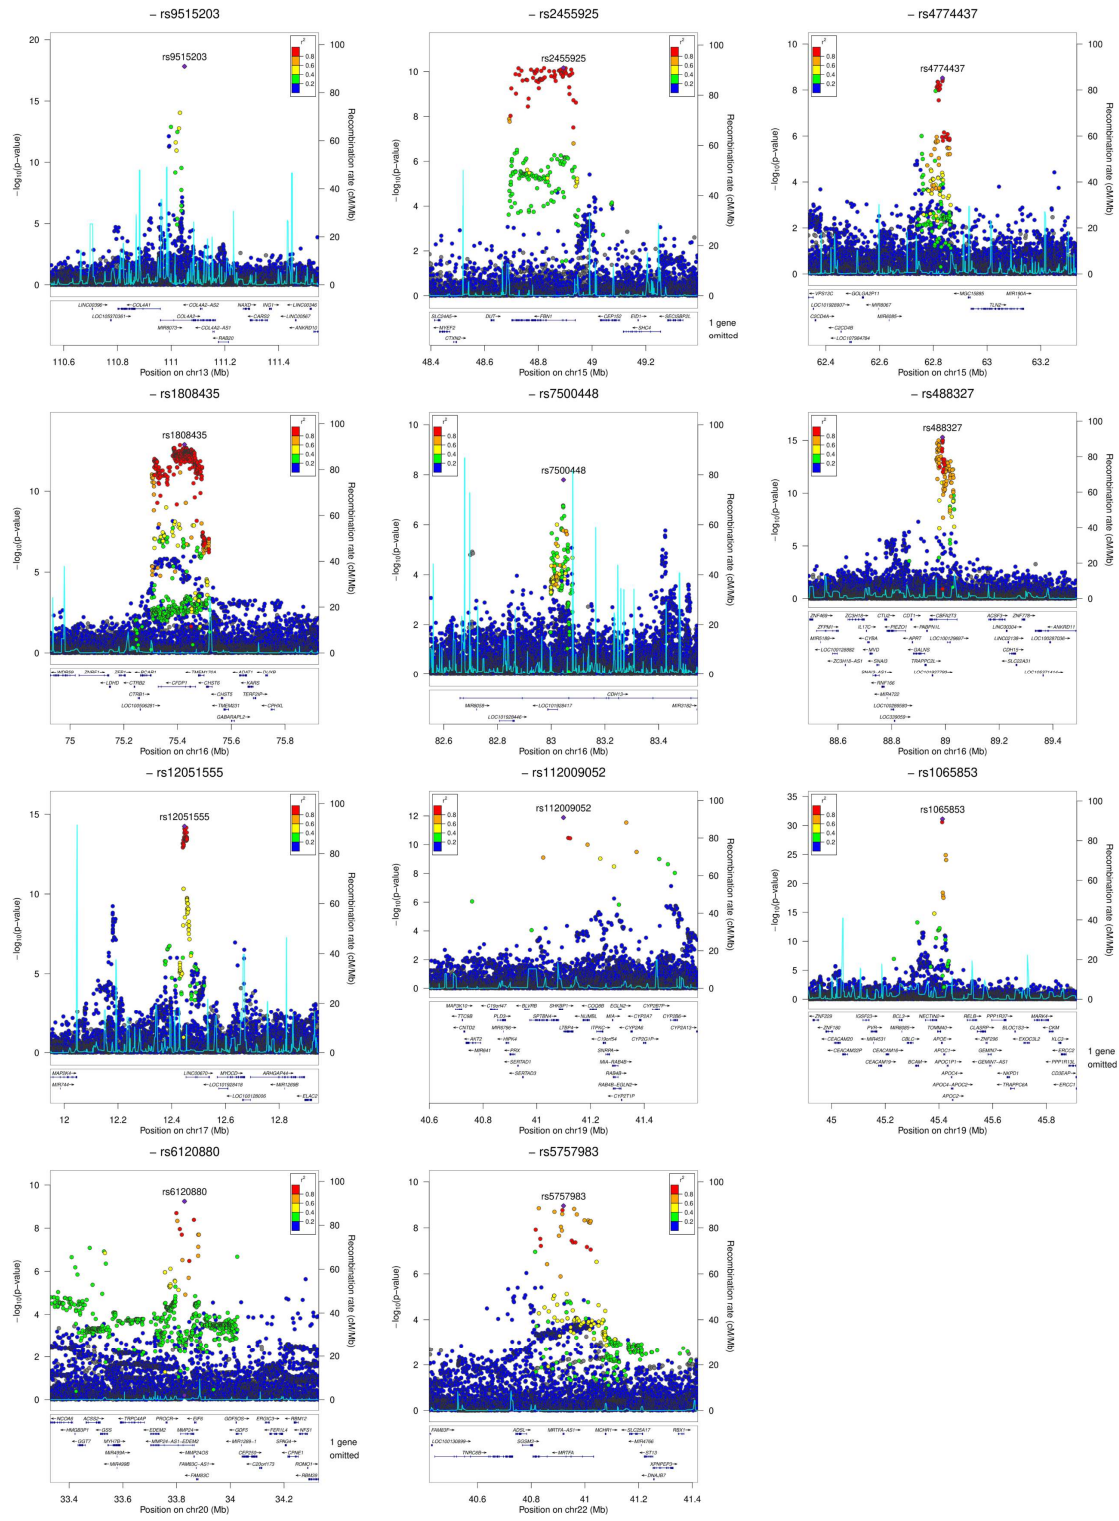

Figure S4. Locus zoom plots for 35 independent cIMT loci.

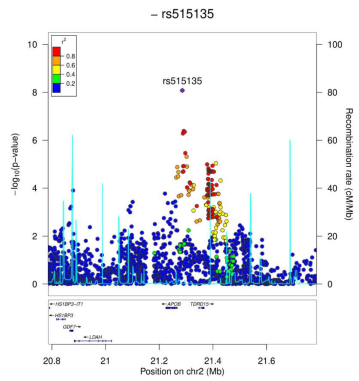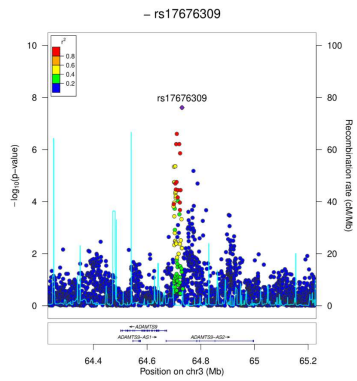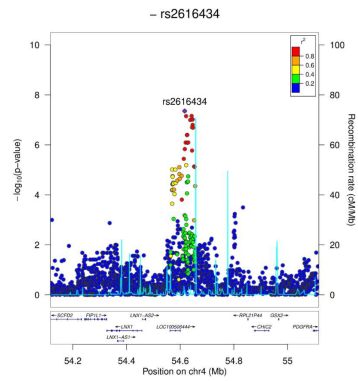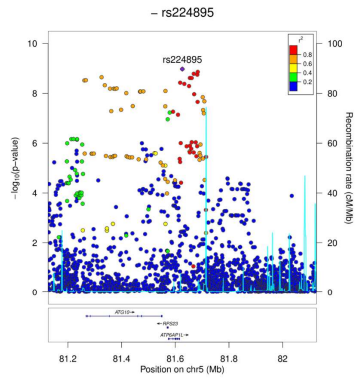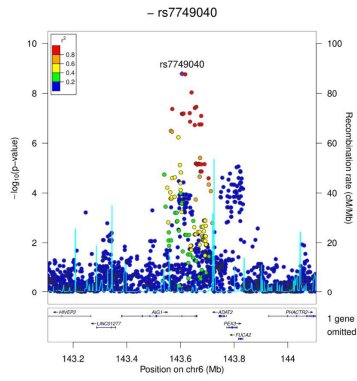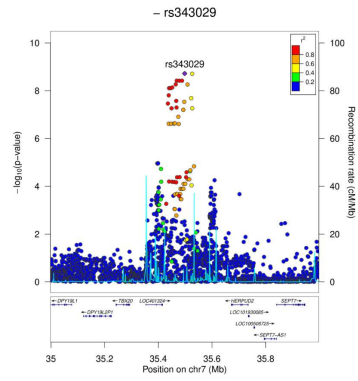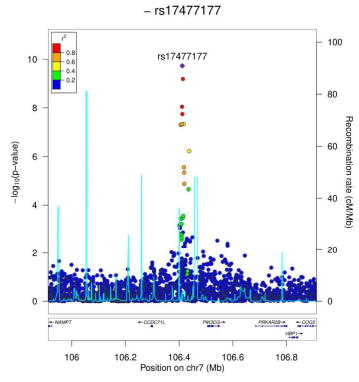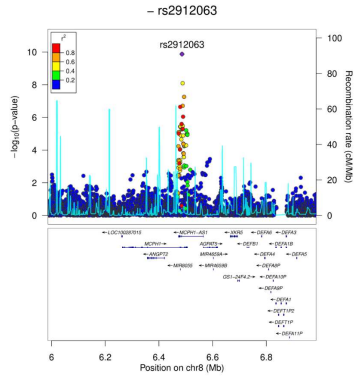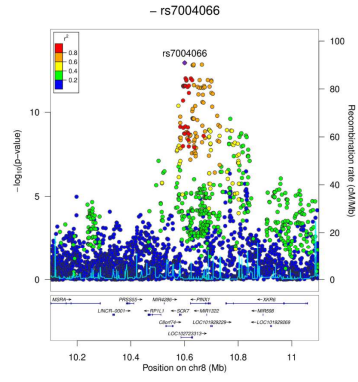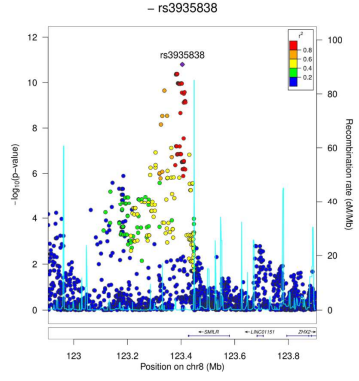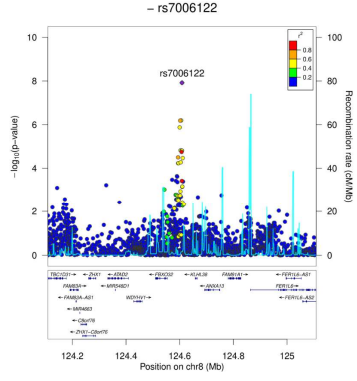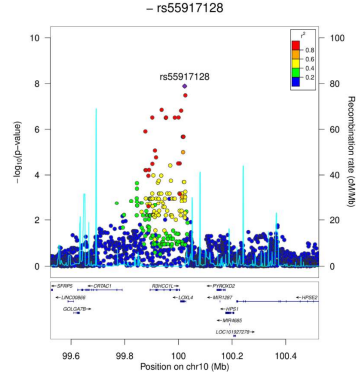

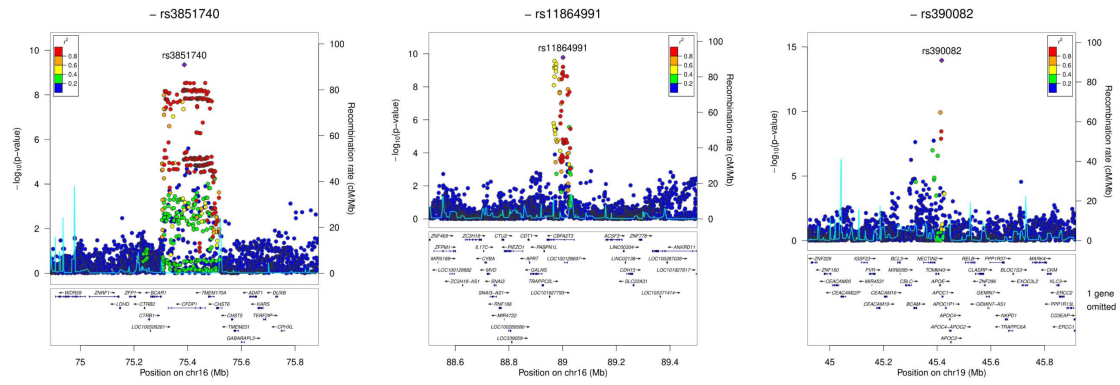

**Figure S5.** Locus zoom plots for cIMT<sub>max</sub> loci from the meta-analysis of UK Biobank and CHARGE/UCLEB consortia.

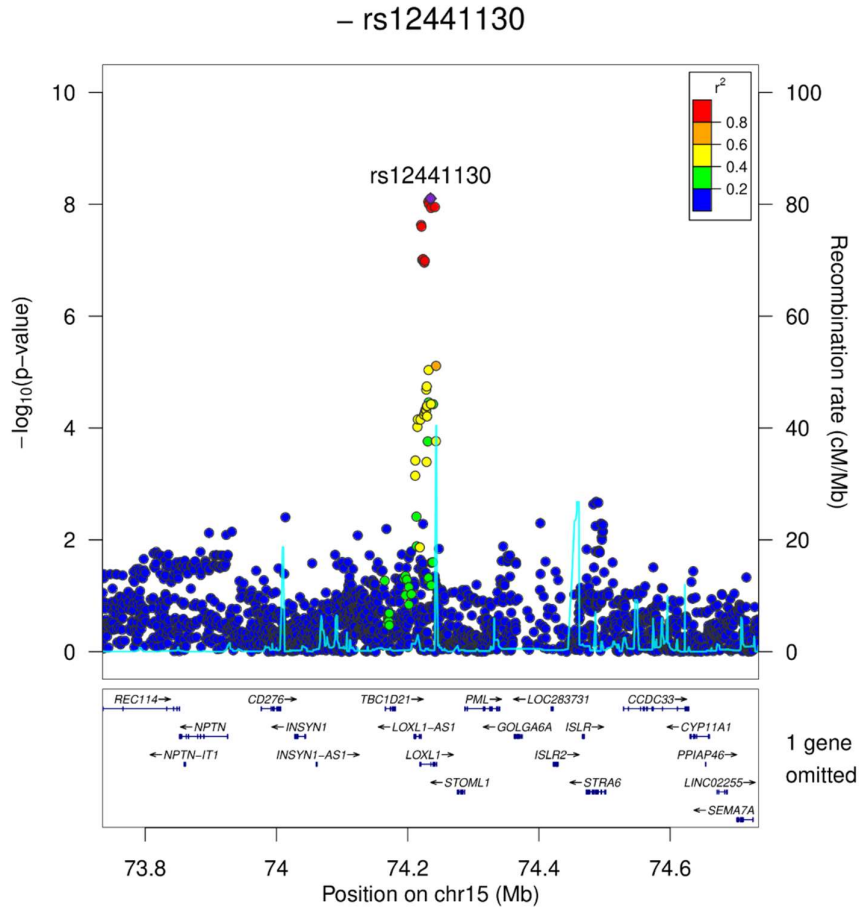

**Figure S6.** Locus zoom plot for *LOXL1* identified in the meta-analysis of the three cIMT measurements.

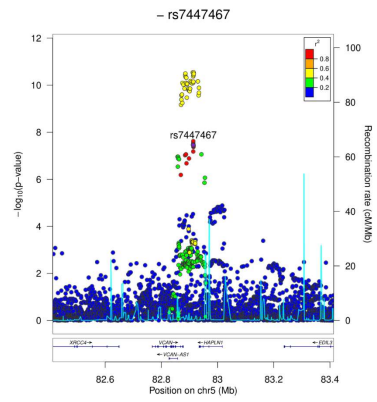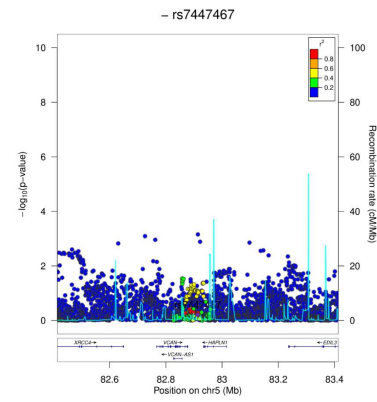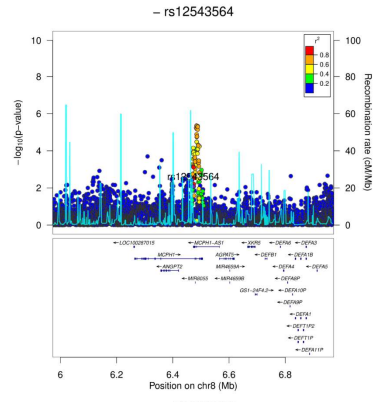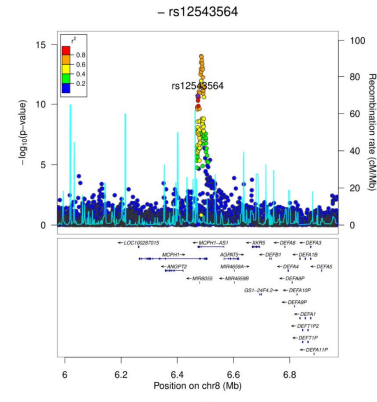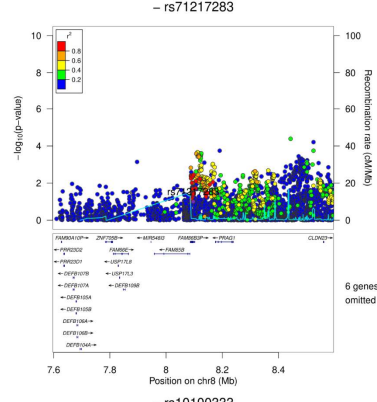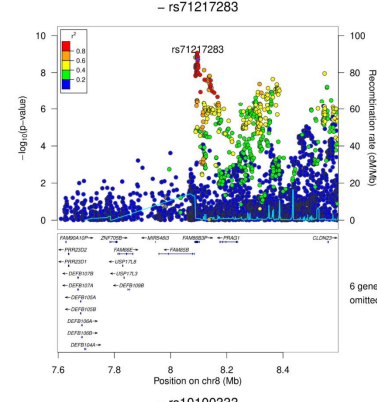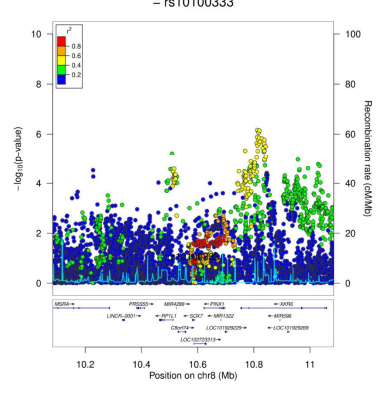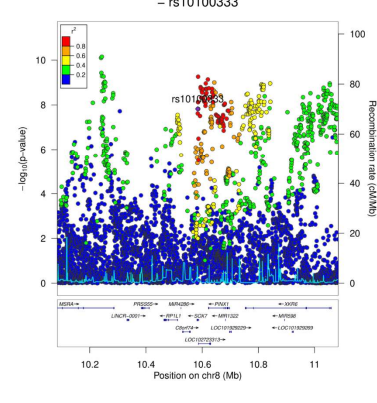



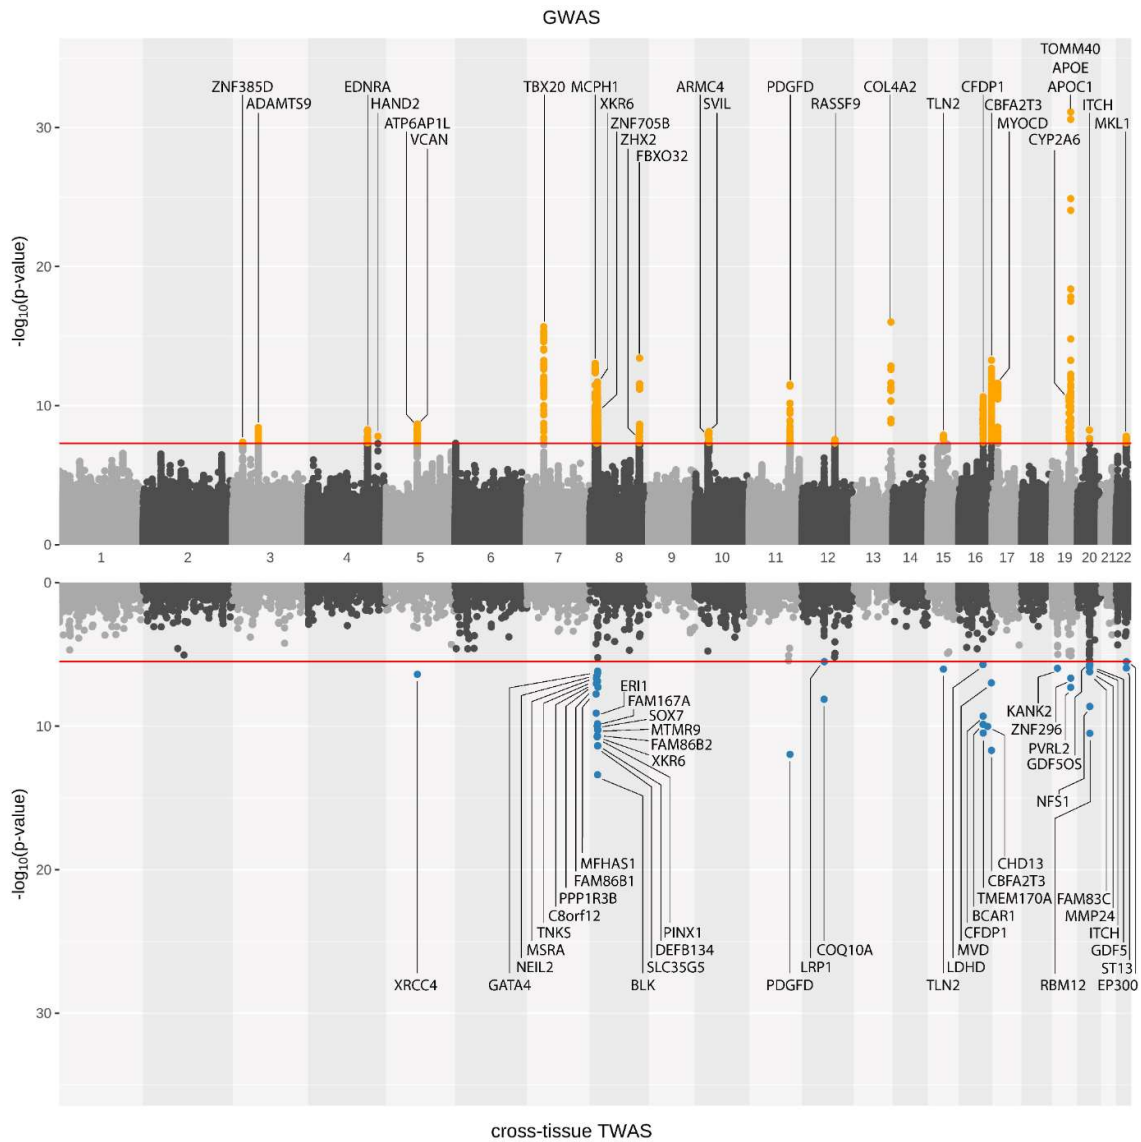

**Figure S8.** Miami plot of  $cIMT_{max}$

The top panel shows the GWAS results while the bottom panel shows results from cross-tissue TWAS. Orange dot: variants passing genome-wide significance threshold ( $P < 5 \times 10^{-8}$ ) in GWAS; Blue dots: genes passing significance threshold after Bonferroni correction ( $P < 3.3 \times 10^{-6}$ ) in TWAS.



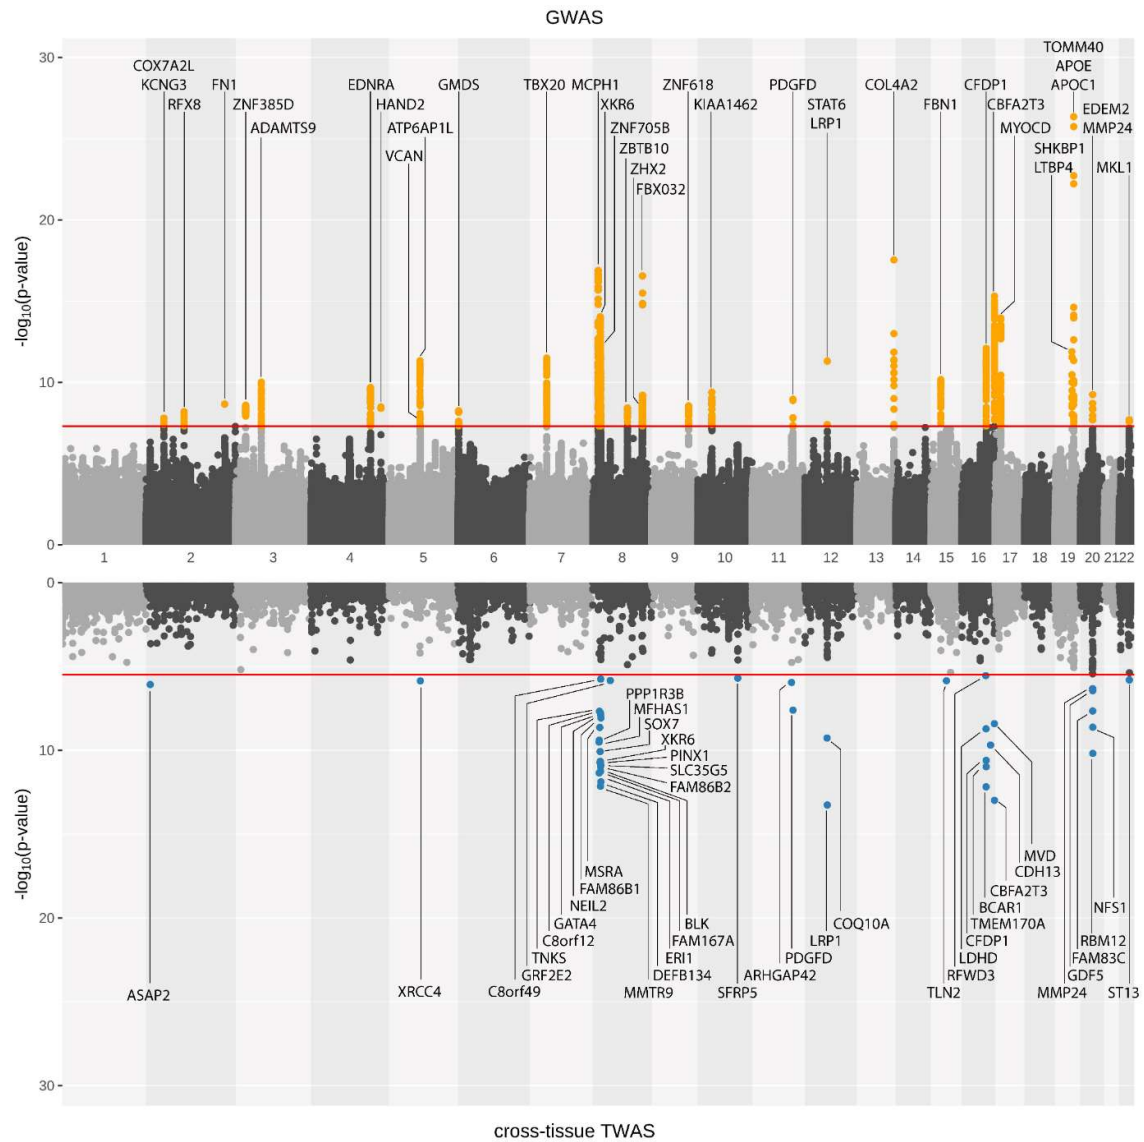

**Figure S9.** Miami plot of  $cIMT_{min}$

The top panel shows the GWAS results while the bottom panel shows results from cross-tissue TWAS. Orange dot: variants passing genome-wide significance threshold ( $P < 5 \times 10^{-8}$ ) in GWAS; Blue dots: genes passing significance threshold after Bonferroni correction ( $P < 3.3 \times 10^{-6}$ ) in TWAS.



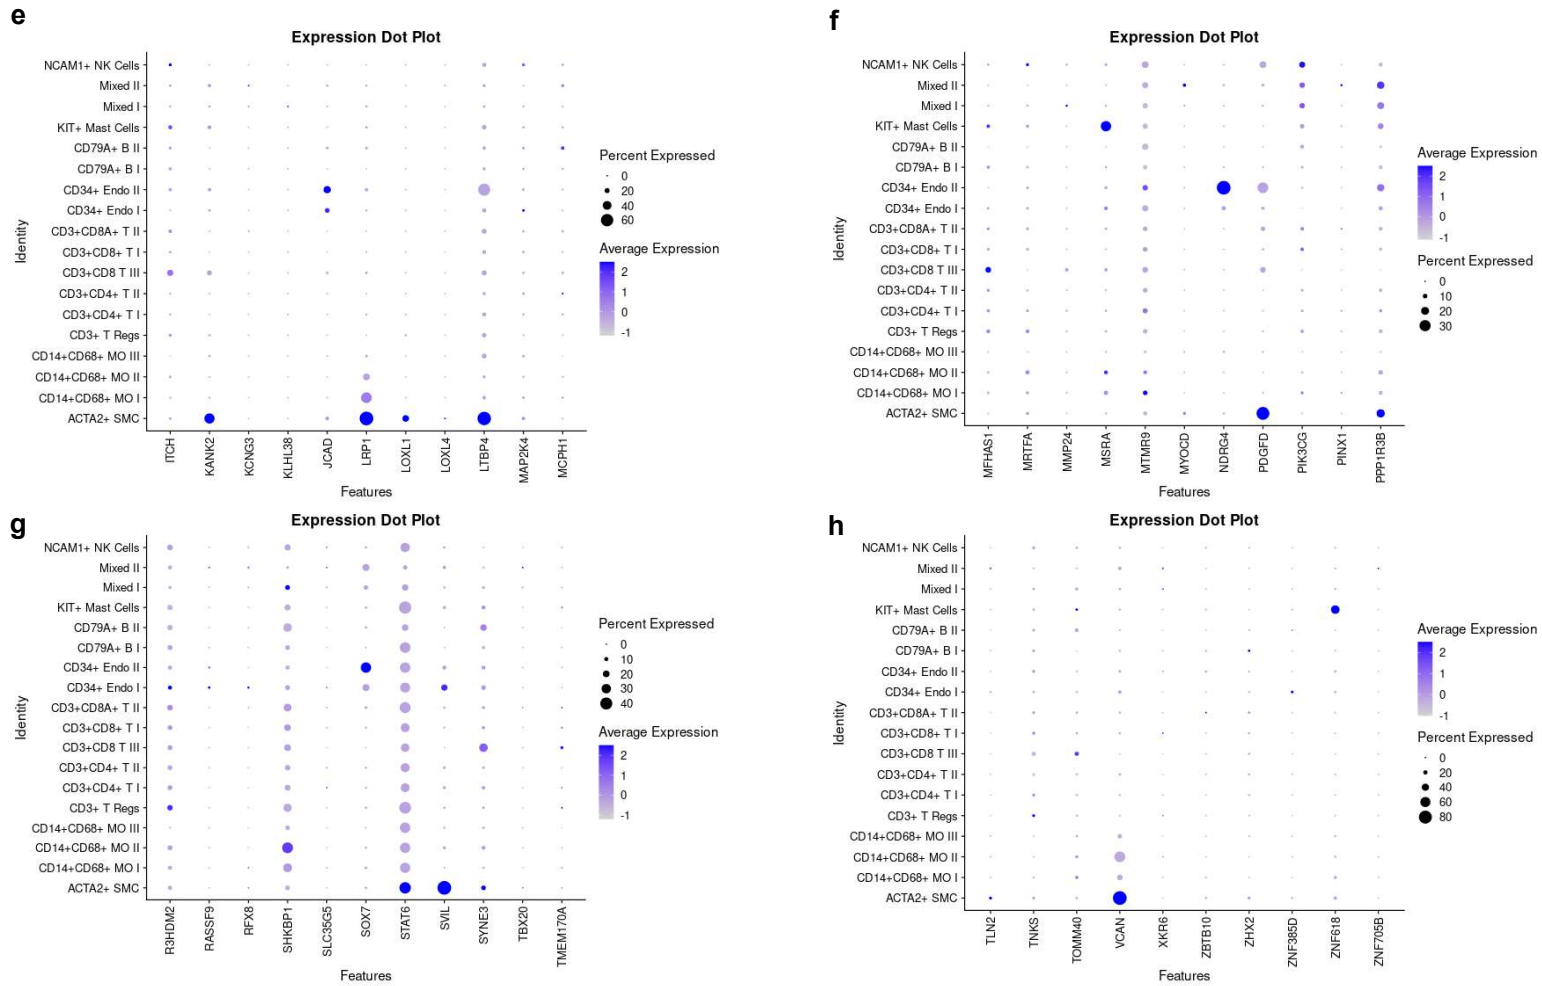

**Figure S10.** Expression of prioritized genes in human carotid plaque tissues.

a. UMAP clustering plots on cell populations denoted with corresponding identities (determined by marker expressions). b-h: Expression levels of genes, which are the closest genes to GWAS loci or prioritized in subsequent bioinformatic analyses, stratified by cell populations. B: B cells; Endo: endothelial; MO: macrophage; NK: natural killer; SMC: smooth muscle cell; T: T cells; T Regs: regulatory T cells.

## Major Resources Table

### Data & Code Availability

| Description                                                       | Source / Repository          | Persistent ID / URL                                                                                                                                                                                                                                                         |
|-------------------------------------------------------------------|------------------------------|-----------------------------------------------------------------------------------------------------------------------------------------------------------------------------------------------------------------------------------------------------------------------------|
| Summary statistics of cIMT GWAS in 45,185 UK Biobank participants | Mendeley                     | doi: 10.17632/47gd92pbn9.1                                                                                                                                                                                                                                                  |
| UK Biobank data                                                   | UK Biobank                   | Available for researchers upon approved request by the UK Biobank<br><a href="https://www.ukbiobank.ac.uk/">https://www.ukbiobank.ac.uk/</a>                                                                                                                                |
| CARDIoGRAMplusC4D summary statistics                              | CARDIoGRAMplusC4D consortium | <a href="http://www.cardiogramplusc4d.org/data-downloads/">http://www.cardiogramplusc4d.org/data-downloads/</a>                                                                                                                                                             |
| CHARGE summary statistics                                         | dbGaP                        | Available for researchers upon approved request by data access committee from NIH dbGaP Study Accession: phs000930.v9.p1 Analysis Accession: pha004762.1                                                                                                                    |
| GERA summary statistics on blood pressure traits                  | GWAS catalog                 | Systolic blood pressure:<br><a href="https://www.ebi.ac.uk/gwas/studies/GCST07095">https://www.ebi.ac.uk/gwas/studies/GCST07095</a><br>Diastolic blood pressure:<br><a href="https://www.ebi.ac.uk/gwas/studies/GCST07098">https://www.ebi.ac.uk/gwas/studies/GCST07098</a> |
| GLGC summary statistics                                           | GLGC                         | <a href="http://csg.sph.umich.edu/willer/public/lipids2013/">http://csg.sph.umich.edu/willer/public/lipids2013/</a>                                                                                                                                                         |
| GTEEx summary statistics                                          | GTEEx portal                 | <a href="https://gtexportal.org/home/datasets">https://gtexportal.org/home/datasets</a>                                                                                                                                                                                     |
| MEGASTROKE summary statistics                                     | MEGASTROKE consortium        | <a href="https://www.megastroke.org/download.html">https://www.megastroke.org/download.html</a>                                                                                                                                                                             |
| BOLT-LMM                                                          |                              | <a href="https://alkesgroup.broadinstitute.org/BOLT-LMM/downloads/">https://alkesgroup.broadinstitute.org/BOLT-LMM/downloads/</a>                                                                                                                                           |
| dbNSFP                                                            |                              | <a href="https://sites.google.com/site/jpopgen/dbNSFP">https://sites.google.com/site/jpopgen/dbNSFP</a>                                                                                                                                                                     |
| DEPICT                                                            |                              | <a href="https://data.broadinstitute.org/mpg/depict/">https://data.broadinstitute.org/mpg/depict/</a>                                                                                                                                                                       |
| FINEMAP                                                           |                              | <a href="http://www.christianbenner.com/">http://www.christianbenner.com/</a>                                                                                                                                                                                               |
| FUMA                                                              |                              | <a href="https://fuma.ctglab.nl/">https://fuma.ctglab.nl/</a>                                                                                                                                                                                                               |
| LDSC                                                              | GitHub                       | <a href="https://github.com/bulik/ldsc">https://github.com/bulik/ldsc</a>                                                                                                                                                                                                   |
| LocusZoom                                                         |                              | <a href="http://locuszoom.org/">http://locuszoom.org/</a>                                                                                                                                                                                                                   |
| MTAG                                                              | GitHub                       | <a href="https://github.com/JonJala/mtag">https://github.com/JonJala/mtag</a>                                                                                                                                                                                               |
| PlaqView                                                          | GitHub                       | <a href="https://github.com/MillerLab-CPHG/PlaqView">https://github.com/MillerLab-CPHG/PlaqView</a>                                                                                                                                                                         |
| PLINK 1.9                                                         |                              | <a href="https://www.cog-genomics.org/plink/">https://www.cog-genomics.org/plink/</a>                                                                                                                                                                                       |
| SMR                                                               |                              | <a href="https://cnsgenomics.com/software/smr/#Overview">https://cnsgenomics.com/software/smr/#Overview</a>                                                                                                                                                                 |
| UTMOST                                                            | GitHub                       | <a href="https://github.com/Joker-Jerome/UTMOST">https://github.com/Joker-Jerome/UTMOST</a>                                                                                                                                                                                 |

## Supplementary Note

### MEGASTROKE CONSORTIUM

Rainer Malik <sup>1</sup>, Ganesh Chauhan <sup>2</sup>, Matthew Traylor <sup>3</sup>, Muralidharan Sargurupremraj <sup>4,5</sup>, Yukinori Okada <sup>6,7,8</sup>, Aniket Mishra <sup>4,5</sup>, Loes Rutten-Jacobs <sup>3</sup>, Anne-Katrin Giese <sup>9</sup>, Sander W van der Laan <sup>10</sup>, Solveig Gretarsdottir <sup>11</sup>, Christopher D Anderson <sup>12,13,14,14</sup>, Michael Chong <sup>15</sup>, Hieab HH Adams <sup>16,17</sup>, Tetsuro Ago <sup>18</sup>, Peter Almgren <sup>19</sup>, Philippe Amouyel <sup>20,21</sup>, Hakan Ay <sup>22,13</sup>, Traci M Bartz <sup>23</sup>, Oscar R Benavente <sup>24</sup>, Steve Bevan <sup>25</sup>, Giorgio B Boncoraglio <sup>26</sup>, Robert D Brown, Jr. <sup>27</sup>, Adam S Butterworth <sup>28,29</sup>, Caty Carrera <sup>30,31</sup>, Cara L Carty <sup>32,33</sup>, Daniel I Chasman <sup>34,35</sup>, Wei-Min Chen <sup>36</sup>, John W Cole <sup>37</sup>, Adolfo Correa <sup>38</sup>, Ioana Cotlarciuc <sup>39</sup>, Carlos Cruchaga <sup>40,41</sup>, John Danesh <sup>28,42,43,44</sup>, Paul IW de Bakker <sup>45,46</sup>, Anita L DeStefano <sup>47,48</sup>, Marcel den Hoed <sup>49</sup>, Qing Duan <sup>50</sup>, Stefan T Engelter <sup>51,52</sup>, Guido J Falcone <sup>53,54</sup>, Rebecca F Gottesman <sup>55</sup>, Raji P Grewal <sup>56</sup>, Vilmundur Gudnason <sup>57,58</sup>, Stefan Gustafsson <sup>59</sup>, Jeffrey Haessler <sup>60</sup>, Tamara B Harris <sup>61</sup>, Ahamad Hassan <sup>62</sup>, Aki S Havulinna <sup>63,64</sup>, Susan R Heckbert <sup>65</sup>, Elizabeth G Holliday <sup>66,67</sup>, George Howard <sup>68</sup>, Fang-Chi Hsu <sup>69</sup>, Hyacinth I Hyacinth <sup>70</sup>, M Arfan Ikram <sup>16</sup>, Erik Ingelsson <sup>71,72</sup>, Marguerite R Irvin <sup>73</sup>, Xueqiu Jian <sup>74</sup>, Jordi Jiménez-Conde <sup>75</sup>, Julie A Johnson <sup>76,77</sup>, J Wouter Jukema <sup>78</sup>, Masahiro Kanai <sup>6,7,79</sup>, Keith L Keene <sup>80,81</sup>, Brett M Kissela <sup>82</sup>, Dawn O Kleindorfer <sup>82</sup>, Charles Kooperberg <sup>60</sup>, Michiaki Kubo <sup>83</sup>, Leslie A Lange <sup>84</sup>, Carl D Langefeld <sup>85</sup>, Claudia Langenberg <sup>86</sup>, Lenore J Launer <sup>87</sup>, Jin-Moo Lee <sup>88</sup>, Robin Lemmens <sup>89,90</sup>, Didier Leys <sup>91</sup>, Cathryn M Lewis <sup>92,93</sup>, Wei-Yu Lin <sup>28,94</sup>, Arne G Lindgren <sup>95,96</sup>, Erik Lorentzen <sup>97</sup>, Patrik K Magnusson <sup>98</sup>, Jane Maguire <sup>99</sup>, Ani Manichaikul <sup>36</sup>, Patrick F McArdle <sup>100</sup>, James F Meschia <sup>101</sup>, Braxton D Mitchell <sup>100,102</sup>, Thomas H Mosley <sup>103,104</sup>, Michael A Nalls <sup>105,106</sup>, Toshiharu Ninomiya <sup>107</sup>, Martin J O'Donnell <sup>15,108</sup>, Bruce M Psaty <sup>109,110,111,112</sup>, Sara L Pulit <sup>113,45</sup>, Kristiina Rannikmäe <sup>114,115</sup>, Alexander P Reiner <sup>65,116</sup>, Kathryn M Rexrode <sup>117</sup>, Kenneth Rice <sup>118</sup>, Stephen S Rich <sup>36</sup>, Paul M Ridker <sup>34,35</sup>, Natalia S Rost <sup>9,13</sup>, Peter M Rothwell <sup>119</sup>, Jerome I Rotter <sup>120,121</sup>, Tatjana Rundek <sup>122</sup>, Ralph L Sacco <sup>122</sup>, Saori Sakaue <sup>7,123</sup>, Michele M Sale <sup>124</sup>, Veikko Salomaa <sup>63</sup>, Bishwa R Sapkota <sup>125</sup>, Reinhold Schmidt <sup>126</sup>, Carsten O Schmidt <sup>127</sup>, Ulf Schminke <sup>128</sup>, Pankaj Sharma <sup>39</sup>, Agnieszka Slowik <sup>129</sup>, Cathie LM Sudlow <sup>114,115</sup>, Christian Tanislav <sup>130</sup>, Turgut Tatlisumak <sup>131,132</sup>, Kent D Taylor <sup>120,121</sup>, Vincent NS Thijs <sup>133,134</sup>, Gudmar Thorleifsson <sup>11</sup>, Unnur Thorsteinsdottir <sup>11</sup>, Steffen Tiedt <sup>1</sup>, Stella Trompet <sup>135</sup>, Christophe Tzourio <sup>5,136,137</sup>, Cornelia M van Duijn <sup>138,139</sup>, Matthew Walters <sup>140</sup>, Nicholas J Wareham <sup>86</sup>, Sylvia Wassertheil-Smoller <sup>141</sup>, James G Wilson <sup>142</sup>, Kerri L Wiggins <sup>109</sup>, Qiong Yang <sup>47</sup>, Salim Yusuf <sup>15</sup>, Najaf Amin <sup>16</sup>, Hugo S Aparicio <sup>185,48</sup>, Donna K Arnett <sup>186</sup>, John Attia <sup>187</sup>, Alexa S Beiser <sup>47,48</sup>, Claudine Berr <sup>188</sup>, Julie E Buring <sup>34,35</sup>, Mariana Bustamante <sup>189</sup>, Valeria Caso <sup>190</sup>, Yu-Ching Cheng <sup>191</sup>, Seung Hoan Choi <sup>192,48</sup>, Ayesha Chowhan <sup>185,48</sup>, Natalia Cullell <sup>31</sup>, Jean-François Dartigues <sup>193,194</sup>, Hossein Delavaran <sup>95,96</sup>, Pilar Delgado <sup>195</sup>, Marcus Dörr <sup>196,197</sup>, Gunnar Engström <sup>19</sup>, Ian Ford <sup>198</sup>, Wander S Gurpreet <sup>199</sup>, Anders Hamsten <sup>200,201</sup>, Laura Heitsch <sup>202</sup>, Atsushi Hozawa <sup>203</sup>, Laura Ibanez <sup>204</sup>, Andreea Ilinca <sup>95,96</sup>, Martin Ingelsson <sup>205</sup>, Motoki Iwasaki <sup>206</sup>, Rebecca D Jackson <sup>207</sup>, Katarina Jood <sup>208</sup>, Pekka Jousilahti <sup>63</sup>, Sara Kaffashian <sup>4,5</sup>, Lalit Kalra <sup>209</sup>, Masahiro Kamouchi <sup>210</sup>, Takanari Kitazono <sup>211</sup>, Olafur Kjartansson <sup>212</sup>, Manja Kloss <sup>213</sup>, Peter J Koudstaal <sup>214</sup>, Jerzy Krupinski <sup>215</sup>, Daniel L Labovitz <sup>216</sup>, Cathy C Laurie <sup>118</sup>, Christopher R Levi <sup>217</sup>, Linxin Li <sup>218</sup>, Lars Lind <sup>219</sup>, Cecilia M Lindgren <sup>220,221</sup>, Vasileios Lioutas <sup>222,48</sup>, Yong Mei Liu <sup>223</sup>, Oscar L Lopez <sup>224</sup>, Hirata Makoto <sup>225</sup>, Nicolas Martinez-Majander <sup>172</sup>, Koichi Matsuda <sup>225</sup>, Naoko Minegishi <sup>203</sup>, Joan Montaner <sup>226</sup>, Andrew P Morris <sup>227,228</sup>, Elena Muiño <sup>31</sup>, Martina Müller-Nurasyid <sup>229,230,231</sup>, Bo Norrving <sup>95,96</sup>, Soichi Ogishima <sup>203</sup>, Eugenio A Parati <sup>232</sup>, Leema Reddy Peddareddygar <sup>56</sup>, Nancy L Pedersen <sup>98,233</sup>, Joanna Pera <sup>129</sup>, Markus Perola <sup>63,234</sup>, Alessandro Pezzini <sup>235</sup>, Silvana Pileggi <sup>236</sup>, Raquel Rabionet <sup>237</sup>, Iolanda Riba-Llena <sup>30</sup>, Marta Ribasés <sup>238</sup>, Jose R Romero <sup>185,48</sup>, Jaume Roquer <sup>239,240</sup>, Anthony G Rudd <sup>241,242</sup>, Antti-Pekka Sarin <sup>243,244</sup>, Ralhan Sarju <sup>199</sup>, Chloe Sarnowski <sup>47,48</sup>, Makoto Sasaki <sup>245</sup>, Claudia L Satizabal <sup>185,48</sup>, Mamoru Satoh <sup>245</sup>, Naveed Sattar <sup>246</sup>, Norie Sawada <sup>206</sup>, Gerli Sibolt <sup>172</sup>, Ásgeir Sigurdsson <sup>247</sup>, Albert Smith <sup>248</sup>, Kenji Sobue <sup>245</sup>, Carolina Soriano-Tárraga <sup>240</sup>, Tara Stanne <sup>249</sup>, O Colin Stine <sup>250</sup>, David J Stott <sup>251</sup>, Konstantin Strauch <sup>229,252</sup>, Takako Takai <sup>203</sup>, Hideo Tanaka <sup>253,254</sup>, Kozo Tanno <sup>245</sup>, Alexander Teumer <sup>255</sup>, Liisa Tomppo <sup>172</sup>, Nuria P Torres-Aguila <sup>31</sup>, Emmanuel Touze <sup>256,257</sup>,

Shoichiro Tsugane <sup>206</sup>, Andre G Uitterlinden <sup>258</sup>, Einar M Valdimarsson <sup>259</sup>, Sven J van der Lee <sup>16</sup>, Henry Völzke <sup>255</sup>, Kenji Wakai <sup>253</sup>, David Weir <sup>260</sup>, Stephen R Williams <sup>261</sup>, Charles DA Wolfe <sup>241,242</sup>, Quenna Wong <sup>118</sup>, Huichun Xu <sup>191</sup>, Taiki Yamaji <sup>206</sup>, Dharambir K Sanghera <sup>125,169,170</sup>, Olle Melander <sup>19</sup>, Christina Jern <sup>171</sup>, Daniel Strbian <sup>172,173</sup>, Israel Fernandez-Cadenas <sup>31,30</sup>, W T Longstreth, Jr <sup>174,65</sup>, Arndt Rolfs <sup>175</sup>, Jun Hata <sup>107</sup>, Daniel Woo <sup>82</sup>, Jonathan Rosand <sup>12,13,14</sup>, Guillaume Pare <sup>15</sup>, Jemma C Hopewell <sup>176</sup>, Danish Saleheen <sup>177</sup>, Kari Stefansson <sup>11,178</sup>, Bradford B Worrall <sup>179</sup>, Steven J Kittner <sup>37</sup>, Sudha Seshadri <sup>180,48</sup>, Myriam Fornage <sup>74,181</sup>, Hugh S Markus <sup>3</sup>, Joanna MM Howson <sup>28</sup>, Yoichiro Kamatani <sup>6,182</sup>, Stephanie Debette <sup>4,5</sup>, Martin Dichgans <sup>1,183,184</sup>

1 Institute for Stroke and Dementia Research (ISD), University Hospital, LMU Munich, Munich, Germany

2 Centre for Brain Research, Indian Institute of Science, Bangalore, India

3 Stroke Research Group, Division of Clinical Neurosciences, University of Cambridge, UK

4 INSERM U1219 Bordeaux Population Health Research Center, Bordeaux, France

5 University of Bordeaux, Bordeaux, France

6 Laboratory for Statistical Analysis, RIKEN Center for Integrative Medical Sciences, Yokohama, Japan

7 Department of Statistical Genetics, Osaka University Graduate School of Medicine, Osaka, Japan

8 Laboratory of Statistical Immunology, Immunology Frontier Research Center (WPI-IFReC), Osaka University, Suita, Japan.

9 Department of Neurology, Massachusetts General Hospital, Harvard Medical School, Boston, MA, USA

10 Laboratory of Experimental Cardiology, Division of Heart and Lungs, University Medical Center Utrecht, University of Utrecht, Utrecht, Netherlands

11 deCODE genetics/AMGEN inc, Reykjavik, Iceland

12 Center for Genomic Medicine, Massachusetts General Hospital (MGH), Boston, MA, USA

13 J. Philip Kistler Stroke Research Center, Department of Neurology, MGH, Boston, MA, USA

14 Program in Medical and Population Genetics, Broad Institute, Cambridge, MA, USA

15 Population Health Research Institute, McMaster University, Hamilton, Canada

16 Department of Epidemiology, Erasmus University Medical Center, Rotterdam, Netherlands

17 Department of Radiology and Nuclear Medicine, Erasmus University Medical Center, Rotterdam, Netherlands

18 Department of Medicine and Clinical Science, Graduate School of Medical Sciences, Kyushu University, Fukuoka, Japan

19 Department of Clinical Sciences, Lund University, Malmö, Sweden

20 Univ. Lille, Inserm, Institut Pasteur de Lille, LabEx DISTALZ-UMR1167, Risk factors and molecular determinants of aging-related diseases, F-59000 Lille, France

21 Centre Hosp. Univ Lille, Epidemiology and Public Health Department, F-59000 Lille, France

22 AA Martinos Center for Biomedical Imaging, Department of Radiology, Massachusetts General Hospital, Harvard Medical School, Boston, MA, USA

23 Cardiovascular Health Research Unit, Departments of Biostatistics and Medicine, University of Washington, Seattle, WA, USA

24 Division of Neurology, Faculty of Medicine, Brain Research Center, University of British Columbia, Vancouver, Canada

25 School of Life Science, University of Lincoln, Lincoln, UK

26 Department of Cerebrovascular Diseases, Fondazione IRCCS Istituto Neurologico "Carlo Besta", Milano, Italy

27 Department of Neurology, Mayo Clinic Rochester, Rochester, MN, USA

28 MRC/BHF Cardiovascular Epidemiology Unit, Department of Public Health and Primary Care, University of Cambridge, Cambridge, UK

29 The National Institute for Health Research Blood and Transplant Research Unit in Donor Health and Genomics, University of Cambridge, UK

30 Neurovascular Research Laboratory, Vall d'Hebron Institut of Research, Neurology and Medicine Departments-Universitat Autònoma de Barcelona, Vall d'Hebrón Hospital, Barcelona, Spain

31 Stroke Pharmacogenomics and Genetics, Fundacio Docència i Recerca MutuaTerrassa, Terrassa, Spain

32 Children's Research Institute, Children's National Medical Center, Washington, DC, USA

33 Center for Translational Science, George Washington University, Washington, DC, USA

34 Division of Preventive Medicine, Brigham and Women's Hospital, Boston, MA, USA

35 Harvard Medical School, Boston, MA, USA

36 Center for Public Health Genomics, Department of Public Health Sciences, University of Virginia, Charlottesville, VA, USA

37 Department of Neurology, University of Maryland School of Medicine and Baltimore VAMC, Baltimore, MD, USA

38 Departments of Medicine, Pediatrics and Population Health Science, University of Mississippi Medical Center, Jackson, MS, USA

39 Institute of Cardiovascular Research, Royal Holloway University of London, UK & Ashford and St Peters Hospital, Surrey UK

40 Department of Psychiatry, The Hope Center Program on Protein Aggregation and Neurodegeneration (HPAN), Washington University, School of Medicine, St. Louis, MO, USA

41 Department of Developmental Biology, Washington University School of Medicine, St. Louis, MO, USA

42 NIHR Blood and Transplant Research Unit in Donor Health and Genomics, Department of Public Health and Primary Care, University of Cambridge, Cambridge, UK

43 Wellcome Trust Sanger Institute, Wellcome Trust Genome Campus, Hinxton, Cambridge, UK

44 British Heart Foundation, Cambridge Centre of Excellence, Department of Medicine, University of Cambridge, Cambridge, UK

45 Department of Medical Genetics, University Medical Center Utrecht, Utrecht, Netherlands

46 Department of Epidemiology, Julius Center for Health Sciences and Primary Care, University Medical Center Utrecht, Utrecht, Netherlands

47 Boston University School of Public Health, Boston, MA, USA

48 Framingham Heart Study, Framingham, MA, USA

49 Department of Immunology, Genetics and Pathology and Science for Life Laboratory, Uppsala University, Uppsala, Sweden

50 Department of Genetics, University of North Carolina, Chapel Hill, NC, USA

51 Department of Neurology and Stroke Center, Basel University Hospital, Switzerland

52 Neurorehabilitation Unit, University and University Center for Medicine of Aging and Rehabilitation Basel, Felix Platter Hospital, Basel, Switzerland

53 Department of Neurology, Yale University School of Medicine, New Haven, CT, USA

54 Program in Medical and Population Genetics, The Broad Institute of Harvard and MIT, Cambridge, MA, USA

55 Department of Neurology, Johns Hopkins University School of Medicine, Baltimore, MD, USA

56 Neuroscience Institute, SF Medical Center, Trenton, NJ, USA

57 Icelandic Heart Association Research Institute, Kopavogur, Iceland

58 University of Iceland, Faculty of Medicine, Reykjavik, Iceland

59 Department of Medical Sciences, Molecular Epidemiology and Science for Life Laboratory, Uppsala University, Uppsala, Sweden

60 Division of Public Health Sciences, Fred Hutchinson Cancer Research Center, Seattle, WA, USA

61 Laboratory of Epidemiology and Population Science, National Institute on Aging, National Institutes of Health, Bethesda, MD, USA

62 Department of Neurology, Leeds General Infirmary, Leeds Teaching Hospitals NHS Trust, Leeds, UK

63 National Institute for Health and Welfare, Helsinki, Finland

64 FIMM - Institute for Molecular Medicine Finland, Helsinki, Finland

65 Department of Epidemiology, University of Washington, Seattle, WA, USA

66 Public Health Stream, Hunter Medical Research Institute, New Lambton, Australia

67 Faculty of Health and Medicine, University of Newcastle, Newcastle, Australia

68 School of Public Health, University of Alabama at Birmingham, Birmingham, AL, USA

69 Department of Biostatistical Sciences, Wake Forest School of Medicine, Winston-Salem, NC, USA

70 Aflac Cancer and Blood Disorder Center, Department of Pediatrics, Emory University School of Medicine, Atlanta, GA, USA

71 Department of Medicine, Division of Cardiovascular Medicine, Stanford University School of Medicine, CA, USA

72 Department of Medical Sciences, Molecular Epidemiology and Science for Life Laboratory, Uppsala University, Uppsala, Sweden

73 Epidemiology, School of Public Health, University of Alabama at Birmingham, USA

74 Brown Foundation Institute of Molecular Medicine, University of Texas Health Science Center at Houston, Houston, TX, USA

75 Neurovascular Research Group (NEUVAS), Neurology Department, Institut Hospital del Mar d'Investigació Mèdica, Universitat Autònoma de Barcelona, Barcelona, Spain

76 Department of Pharmacotherapy and Translational Research and Center for Pharmacogenomics, University of Florida, College of Pharmacy, Gainesville, FL, USA

77 Division of Cardiovascular Medicine, College of Medicine, University of Florida, Gainesville, FL, USA

78 Department of Cardiology, Leiden University Medical Center, Leiden, the Netherlands

79 Program in Bioinformatics and Integrative Genomics, Harvard Medical School, Boston, MA, USA

80 Department of Biology, East Carolina University, Greenville, NC, USA

81 Center for Health Disparities, East Carolina University, Greenville, NC, USA

82 University of Cincinnati College of Medicine, Cincinnati, OH, USA

83 RIKEN Center for Integrative Medical Sciences, Yokohama, Japan

84 Department of Medicine, University of Colorado Denver, Anschutz Medical Campus, Aurora, CO, USA

85 Center for Public Health Genomics and Department of Biostatistical Sciences, Wake Forest School of Medicine, Winston-Salem, NC, USA

86 MRC Epidemiology Unit, University of Cambridge School of Clinical Medicine, Institute of Metabolic Science, Cambridge Biomedical Campus, Cambridge, UK

87 Intramural Research Program, National Institute on Aging, National Institutes of Health, Bethesda, MD, USA

88 Department of Neurology, Radiology, and Biomedical Engineering, Washington University School of Medicine, St. Louis, MO, USA

89 KU Leuven – University of Leuven, Department of Neurosciences, Experimental Neurology, Leuven, Belgium

90 VIB Center for Brain & Disease Research, University Hospitals Leuven, Department of Neurology, Leuven, Belgium

91 Univ.-Lille, INSERM U 1171. CHU Lille. Lille, France

92 Department of Medical and Molecular Genetics, King's College London, London, UK

93 SGDP Centre, Institute of Psychiatry, Psychology & Neuroscience, King's College London, London, UK

94 Northern Institute for Cancer Research, Paul O'Gorman Building, Newcastle University, Newcastle, UK

95 Department of Clinical Sciences Lund, Neurology, Lund University, Lund, Sweden

96 Department of Neurology and Rehabilitation Medicine, Skåne University Hospital, Lund, Sweden

97 Bioinformatics Core Facility, University of Gothenburg, Gothenburg, Sweden

98 Department of Medical Epidemiology and Biostatistics, Karolinska Institutet, Stockholm, Sweden



99 University of Technology Sydney, Faculty of Health, Ultimo, Australia  
100 Department of Medicine, University of Maryland School of Medicine, MD, USA  
101 Department of Neurology, Mayo Clinic, Jacksonville, FL, USA  
102 Geriatrics Research and Education Clinical Center, Baltimore Veterans Administration Medical Center, Baltimore, MD, USA  
103 Division of Geriatrics, School of Medicine, University of Mississippi Medical Center, Jackson, MS, USA  
104 Memory Impairment and Neurodegenerative Dementia Center, University of Mississippi Medical Center, Jackson, MS, USA  
105 Laboratory of Neurogenetics, National Institute on Aging, National Institutes of Health, Bethesda, MD, USA  
106 Data Tecnica International, Glen Echo MD, USA  
107 Department of Epidemiology and Public Health, Graduate School of Medical Sciences, Kyushu University, Fukuoka, Japan  
108 Clinical Research Facility, Department of Medicine, NUI Galway, Galway, Ireland  
109 Cardiovascular Health Research Unit, Department of Medicine, University of Washington, Seattle, WA, USA  
110 Department of Epidemiology, University of Washington, Seattle, WA  
111 Department of Health Services, University of Washington, Seattle, WA, USA  
112 Kaiser Permanente Washington Health Research Institute, Seattle, WA, USA  
113 Brain Center Rudolf Magnus, Department of Neurology, University Medical Center Utrecht, Utrecht, The Netherlands  
114 Usher Institute of Population Health Sciences and Informatics, University of Edinburgh, Edinburgh, UK  
115 Centre for Clinical Brain Sciences, University of Edinburgh, Edinburgh, UK  
116 Fred Hutchinson Cancer Research Center, University of Washington, Seattle, WA, USA  
117 Department of Medicine, Brigham and Women's Hospital, Boston, MA, USA  
118 Department of Biostatistics, University of Washington, Seattle, WA, USA  
119 Nuffield Department of Clinical Neurosciences, University of Oxford, UK  
120 Institute for Translational Genomics and Population Sciences, Los Angeles Biomedical Research Institute at Harbor-UCLA Medical Center, Torrance, CA, USA  
121 Division of Genomic Outcomes, Department of Pediatrics, Harbor-UCLA Medical Center, Torrance, CA, USA  
122 Department of Neurology, Miller School of Medicine, University of Miami, Miami, FL, USA  
123 Department of Allergy and Rheumatology, Graduate School of Medicine, the University of Tokyo, Tokyo, Japan  
124 Center for Public Health Genomics, University of Virginia, Charlottesville, VA, USA  
125 Department of Pediatrics, College of Medicine, University of Oklahoma Health Sciences Center, Oklahoma City, OK, USA  
126 Department of Neurology, Medical University of Graz, Graz, Austria  
127 University Medicine Greifswald, Institute for Community Medicine, SHIP-KEF, Greifswald, Germany  
128 University Medicine Greifswald, Department of Neurology, Greifswald, Germany  
129 Department of Neurology, Jagiellonian University, Krakow, Poland  
130 Department of Neurology, Justus Liebig University, Giessen, Germany  
131 Department of Clinical Neurosciences/Neurology, Institute of Neuroscience and Physiology, Sahlgrenska Academy at University of Gothenburg, Gothenburg, Sweden  
132 Sahlgrenska University Hospital, Gothenburg, Sweden  
133 Stroke Division, Florey Institute of Neuroscience and Mental Health, University of Melbourne, Heidelberg, Australia  
134 Austin Health, Department of Neurology, Heidelberg, Australia  
135 Department of Internal Medicine, Section Gerontology and Geriatrics, Leiden University Medical Center, Leiden, the Netherlands  
136 INSERM U1219, Bordeaux, France  
137 Department of Public Health, Bordeaux University Hospital, Bordeaux, France

138 Genetic Epidemiology Unit, Department of Epidemiology, Erasmus University Medical Center Rotterdam, Netherlands

139 Center for Medical Systems Biology, Leiden, Netherlands

140 School of Medicine, Dentistry and Nursing at the University of Glasgow, Glasgow, UK

141 Department of Epidemiology and Population Health, Albert Einstein College of Medicine, NY, USA

142 Department of Physiology and Biophysics, University of Mississippi Medical Center, Jackson, MS, USA

143 A full list of members and affiliations appears in the Supplementary Note

144 Department of Human Genetics, McGill University, Montreal, Canada

145 Department of Pathophysiology, Institute of Biomedicine and Translation Medicine, University of Tartu, Tartu, Estonia

146 Department of Cardiac Surgery, Tartu University Hospital, Tartu, Estonia

147 Clinical Gene Networks AB, Stockholm, Sweden

148 Department of Genetics and Genomic Sciences, The Icahn Institute for Genomics and Multiscale Biology Icahn School of Medicine at Mount Sinai, New York, NY, USA

149 Department of Pathophysiology, Institute of Biomedicine and Translation Medicine, University of Tartu, Biomeedikum, Tartu, Estonia

150 Integrated Cardio Metabolic Centre, Department of Medicine, Karolinska Institutet, Karolinska Universitetssjukhuset, Huddinge, Sweden.

151 Clinical Gene Networks AB, Stockholm, Sweden

152 Sorbonne Universités, UPMC Univ. Paris 06, INSERM, UMR\_S 1166, Team Genomics & Pathophysiology of Cardiovascular Diseases, Paris, France

153 ICAN Institute for Cardiometabolism and Nutrition, Paris, France

154 Department of Biomedical Engineering, University of Virginia, Charlottesville, VA, USA

155 Group Health Research Institute, Group Health Cooperative, Seattle, WA, USA

156 Seattle Epidemiologic Research and Information Center, VA Office of Research and Development, Seattle, WA, USA

157 Cardiovascular Research Center, Massachusetts General Hospital, Boston, MA, USA

158 Department of Medical Research, Bærum Hospital, Vestre Viken Hospital Trust, Gjøttum, Norway

159 Saw Swee Hock School of Public Health, National University of Singapore and National University Health System, Singapore

160 National Heart and Lung Institute, Imperial College London, London, UK

161 Department of Gene Diagnostics and Therapeutics, Research Institute, National Center for Global Health and Medicine, Tokyo, Japan

162 Department of Epidemiology, Tulane University School of Public Health and Tropical Medicine, New Orleans, LA, USA

163 Department of Cardiology, University Medical Center Groningen, University of Groningen, Netherlands

164 MRC-PHE Centre for Environment and Health, School of Public Health, Department of Epidemiology and Biostatistics, Imperial College London, London, UK

165 Department of Epidemiology and Biostatistics, Imperial College London, London, UK

166 Department of Cardiology, Ealing Hospital NHS Trust, Southall, UK

167 National Heart, Lung and Blood Research Institute, Division of Intramural Research, Population Sciences Branch, Framingham, MA, USA

168 A full list of members and affiliations appears at the end of the manuscript

169 Department of Pharmaceutical Sciences, College of Pharmacy, University of Oklahoma Health Sciences Center, Oklahoma City, OK, USA

170 Oklahoma Center for Neuroscience, Oklahoma City, OK, USA

171 Department of Pathology and Genetics, Institute of Biomedicine, The Sahlgrenska Academy at University of Gothenburg, Gothenburg, Sweden

172 Department of Neurology, Helsinki University Hospital, Helsinki, Finland

173 Clinical Neurosciences, Neurology, University of Helsinki, Helsinki, Finland

174 Department of Neurology, University of Washington, Seattle, WA, USA

175 Albrecht Kossel Institute, University Clinic of Rostock, Rostock, Germany

176 Clinical Trial Service Unit and Epidemiological Studies Unit, Nuffield Department of Population Health, University of Oxford, Oxford, UK

177 Department of Genetics, Perelman School of Medicine, University of Pennsylvania, PA, USA

178 Faculty of Medicine, University of Iceland, Reykjavik, Iceland

179 Departments of Neurology and Public Health Sciences, University of Virginia School of Medicine, Charlottesville, VA, USA

180 Department of Neurology, Boston University School of Medicine, Boston, MA, USA

181 Human Genetics Center, University of Texas Health Science Center at Houston, Houston, TX, USA

182 Center for Genomic Medicine, Kyoto University Graduate School of Medicine, Kyoto, Japan

183 Munich Cluster for Systems Neurology (SyNergy), Munich, Germany

184 German Center for Neurodegenerative Diseases (DZNE), Munich, Germany

185 Boston University School of Medicine, Boston, MA, USA

186 University of Kentucky College of Public Health, Lexington, KY, USA

187 University of Newcastle and Hunter Medical Research Institute, New Lambton, Australia

188 Univ. Montpellier, Inserm, U1061, Montpellier, France

189 Centre for Research in Environmental Epidemiology, Barcelona, Spain

190 Department of Neurology, Università degli Studi di Perugia, Umbria, Italy

191 Department of Medicine, University of Maryland School of Medicine, Baltimore, MD, USA

192 Broad Institute, Cambridge, MA, USA

193 Univ. Bordeaux, Inserm, Bordeaux Population Health Research Center, UMR 1219, Bordeaux, France

194 Bordeaux University Hospital, Department of Neurology, Memory Clinic, Bordeaux, France

195 Neurovascular Research Laboratory. Vall d'Hebron Institut of Research, Neurology and Medicine Departments-Universitat Autònoma de Barcelona. Vall d'Hebrón Hospital, Barcelona, Spain

196 University Medicine Greifswald, Department of Internal Medicine B, Greifswald, Germany

197 DZHK, Greifswald, Germany

198 Robertson Center for Biostatistics, University of Glasgow, Glasgow, UK

199 Hero DMC Heart Institute, Dayanand Medical College & Hospital, Ludhiana, India

200 Atherosclerosis Research Unit, Department of Medicine Solna, Karolinska Institutet, Stockholm, Sweden

201 Karolinska Institutet, Stockholm, Sweden

202 Division of Emergency Medicine, and Department of Neurology, Washington University School of Medicine, St. Louis, MO, USA

203 Tohoku Medical Megabank Organization, Sendai, Japan

204 Department of Psychiatry, Washington University School of Medicine, St. Louis, MO, USA

205 Department of Public Health and Caring Sciences / Geriatrics, Uppsala University, Uppsala, Sweden

206 Epidemiology and Prevention Group, Center for Public Health Sciences, National Cancer Center, Tokyo, Japan

207 Department of Internal Medicine and the Center for Clinical and Translational Science, The Ohio State University, Columbus, OH, USA

208 Institute of Neuroscience and Physiology, the Sahlgrenska Academy at University of Gothenburg, Goteborg, Sweden

209 Department of Basic and Clinical Neurosciences, King's College London, London, UK

210 Department of Health Care Administration and Management, Graduate School of Medical Sciences, Kyushu University, Japan

211 Department of Medicine and Clinical Science, Graduate School of Medical Sciences, Kyushu University, Japan

212 Landspítali National University Hospital, Departments of Neurology & Radiology, Reykjavik, Iceland

213 Department of Neurology, Heidelberg University Hospital, Germany

214 Department of Neurology, Erasmus University Medical Center

215 Hospital Universitari Mutua Terrassa, Terrassa (Barcelona), Spain

216 Albert Einstein College of Medicine, Montefiore Medical Center, New York, NY, USA

217 John Hunter Hospital, Hunter Medical Research Institute and University of Newcastle, Newcastle, NSW, Australia

218 Centre for Prevention of Stroke and Dementia, Nuffield Department of Clinical Neurosciences, University of Oxford, UK

219 Department of Medical Sciences, Uppsala University, Uppsala, Sweden

220 Genetic and Genomic Epidemiology Unit, Wellcome Trust Centre for Human Genetics, University of Oxford, Oxford, UK

221 The Wellcome Trust Centre for Human Genetics, Oxford, UK

222 Beth Israel Deaconess Medical Center, Boston, MA, USA

223 Wake Forest School of Medicine, Wake Forest, NC, USA

224 Department of Neurology, University of Pittsburgh, Pittsburgh, PA, USA

225 BioBank Japan, Laboratory of Clinical Sequencing, Department of Computational biology and medical Sciences, Graduate school of Frontier Sciences, The University of Tokyo, Tokyo, Japan

226 Neurovascular Research Laboratory, Vall d'Hebron Institut of Research, Neurology and Medicine Departments-Universitat Autònoma de Barcelona. Vall d'Hebrón Hospital, Barcelona, Spain

227 Department of Biostatistics, University of Liverpool, Liverpool, UK

228 Wellcome Trust Centre for Human Genetics, University of Oxford, Oxford, UK

229 Institute of Genetic Epidemiology, Helmholtz Zentrum München - German Research Center for Environmental Health, Neuherberg, Germany

230 Department of Medicine I, Ludwig-Maximilians-Universität, Munich, Germany

231 DZHK (German Centre for Cardiovascular Research), partner site Munich Heart Alliance, Munich, Germany

232 Department of Cerebrovascular Diseases, Fondazione IRCCS Istituto Neurologico "Carlo Besta", Milano, Italy

233 Karolinska Institutet, MEB, Stockholm, Sweden

234 University of Tartu, Estonian Genome Center, Tartu, Estonia, Tartu, Estonia

235 Department of Clinical and Experimental Sciences, Neurology Clinic, University of Brescia, Italy

236 Translational Genomics Unit, Department of Oncology, IRCCS Istituto di Ricerche Farmacologiche Mario Negri, Milano, Italy

237 Department of Genetics, Microbiology and Statistics, University of Barcelona, Barcelona, Spain

238 Psychiatric Genetics Unit, Group of Psychiatry, Mental Health and Addictions, Vall d'Hebron Research Institute (VHIR), Universitat Autònoma de Barcelona, Biomedical Network Research Centre on Mental Health (CIBERSAM), Barcelona, Spain

239 Department of Neurology, IMIM-Hospital del Mar, and Universitat Autònoma de Barcelona, Spain

240 IMIM (Hospital del Mar Medical Research Institute), Barcelona, Spain

241 National Institute for Health Research Comprehensive Biomedical Research Centre, Guy's & St. Thomas' NHS Foundation Trust and King's College London, London, UK

242 Division of Health and Social Care Research, King's College London, London, UK

243 FIMM-Institute for Molecular Medicine Finland, Helsinki, Finland

244 THL-National Institute for Health and Welfare, Helsinki, Finland

245 Iwate Tohoku Medical Megabank Organization, Iwate Medical University, Iwate, Japan

246 BHF Glasgow Cardiovascular Research Centre, Faculty of Medicine, Glasgow, UK

247 deCODE Genetics/Amgen, Inc., Reykjavik, Iceland

248 Icelandic Heart Association, Reykjavik, Iceland

249 Institute of Biomedicine, the Sahlgrenska Academy at University of Gothenburg, Goteborg, Sweden

250 Department of Epidemiology, University of Maryland School of Medicine, Baltimore, MD, USA  
251 Institute of Cardiovascular and Medical Sciences, Faculty of Medicine, University of Glasgow, Glasgow, UK  
252 Chair of Genetic Epidemiology, IBE, Faculty of Medicine, LMU Munich, Germany  
253 Division of Epidemiology and Prevention, Aichi Cancer Center Research Institute, Nagoya, Japan  
254 Department of Epidemiology, Nagoya University Graduate School of Medicine, Nagoya, Japan  
255 University Medicine Greifswald, Institute for Community Medicine, SHIP-KEF, Greifswald, Germany  
256 Department of Neurology, Caen University Hospital, Caen, France  
257 University of Caen Normandy, Caen, France  
258 Department of Internal Medicine, Erasmus University Medical Center, Rotterdam, Netherlands  
259 Landspítali University Hospital, Reykjavik, Iceland  
260 Survey Research Center, University of Michigan, Ann Arbor, MI, USA  
261 University of Virginia Department of Neurology, Charlottesville, VA, US

## Reference

121. Fry D, Almond R, Moffat S, Gordon M, Singh P. UK Biobank Biomarker Project Companion Document to Accompany Serum Biomarker Data. Published online 2019. Accessed August 5, 2021. <http://www.ukbiobank.ac.uk/uk-biobank-biomarker-panel/>.
122. UK Biobank Blood Pressure. Accessed July 31, 2021. <http://www.ukbiobank.ac.uk/>
123. Zhu Z, Zhang F, Hu H, Bakshi A, Robinson MR, Powell JE, Montgomery GW, Goddard ME, Wray NR, Visscher PM, et al. Integration of summary data from GWAS and eQTL studies predicts complex trait gene targets. *Nat Genet.* 2016;48:481-487. doi:10.1038/ng.3538
124. Ma WF, Hodonsky CJ, Turner AW, Wong D, Song Y, Barrientos NB, Mosquera JV, Miller CL. Single-cell RNA-seq analysis of human coronary arteries using an enhanced workflow reveals SMC transitions and candidate drug targets. *bioRxiv*. Published online March 17, 2021:2020.10.27.357715. doi:10.1101/2020.10.27.357715
125. Pers TH, Karjalainen JM, Chan Y, Westra HJ, Wood AR, Yang J, Lui JC, Vedantam S, Gustafsson S, Esko T, et al. Biological interpretation of genome-wide association studies using predicted gene functions. *Nat Commun.* 2015;6:5890. doi:10.1038/ncomms6890
